# Supplementary material for: Ultra-broadband infrared metamaterial absorber based on MDMDM structure for optical sensing
Source: Frontiers journal article supplement (doi:10.3389/fspas.2023.1338284), 2024-01-05
Supplement: Data_Sheet_1.XLSX [file Data_Sheet_1.XLSX]

## Sheet: Wavelength_A_T_R
Wavelength(μm)	1.5		Absorption (A)	0.60041		Transmission (T)	4.50947e-09		Reflection (R)	0.39959		0.974124
	1.54202			0.53125			6.15172e-09			0.46875
	1.58403			0.48254			1.02094e-08			0.51746		0.975437
	1.62605			0.46292			1.33224e-08			0.53708
	1.66807			0.47008			1.6037e-08			0.52992
	1.71008			0.49476			1.9041e-08			0.50524
	1.7521			0.52848			2.54185e-08			0.47152
	1.79412			0.56645			3.5575e-08			0.43355
	1.83613			0.60614			4.95972e-08			0.39386
	1.87815			0.64613			8.09422e-08			0.35387
	1.92017			0.68772			1.10664e-07			0.31228
	1.96218			0.73551			1.7065e-07			0.26449
	2.0042			0.8714			2.01624e-07			0.1286
	2.04622			0.94244			2.10004e-07			0.05756
	2.08824			0.9694			8.93175e-07			0.0306
	2.13025			0.98845			9.66775e-07			0.01155
	2.17227			0.98235			1.20008e-06			0.01765
	2.21429			0.97612			1.56329e-06			0.02388
	2.2563			0.97377			2.10603e-06			0.02622
	2.29832			0.9747			2.84979e-06			0.0253
	2.34034			0.97785			3.83308e-06			0.02215
	2.38235			0.98213			5.15022e-06			0.01787
	2.42437			0.98665			6.87424e-06			0.01335
	2.46639			0.9907			8.70862e-06			0.00929
	2.5084			0.99359			1.09781e-05			0.0064
	2.55042			0.99507			1.32229e-05			0.00492
	2.59244			0.99493			1.57401e-05			0.00506
	2.63445			0.99321			1.76267e-05			0.00678
	2.67647			0.99001			1.91328e-05			0.00997
	2.71849			0.98565			2.01953e-05			0.01433
	2.7605			0.98049			2.05317e-05			0.01949
	2.80252			0.97488			2.00704e-05			0.0251
	2.84454			0.96918			1.88994e-05			0.0308
	2.88655			0.96373			1.71901e-05			0.03625
	2.92857			0.95883			1.52349e-05			0.04115
	2.97059			0.95475			1.34092e-05			0.04524
	3.01261			0.95169			1.16931e-05			0.0483
	3.05462			0.94972			9.6102e-06			0.05027
	3.09664			0.94893			7.78913e-06			0.05106
	3.13866			0.94942			6.69053e-06			0.05057
	3.18067			0.95098			5.07473e-06			0.04901
	3.22269			0.9536			4.33284e-06			0.04639
	3.26471			0.95707			3.19825e-06			0.04293
	3.30672			0.96123			2.78239e-06			0.03877
	3.34874			0.96581			1.89596e-06			0.03419
	3.39076			0.97071			1.72375e-06			0.02929
	3.43277			0.97556			1.24574e-06			0.02444
	3.47479			0.98029			8.25056e-07			0.01971
	3.51681			0.98469			8.19394e-07			0.01531
	3.55882			0.98854			6.38329e-07			0.01146
	3.60084			0.99176			3.29686e-07			0.00824
	3.64286			0.99428			2.10238e-07			0.00572
	3.68487			0.99601			2.46122e-07			0.00399
	3.72689			0.99686			2.66793e-07			0.00314
	3.76891			0.99681			2.15611e-07			0.00319
	3.81092			0.99587			1.31506e-07			0.00413
	3.85294			0.9941			6.09087e-08			0.0059
	3.89496			0.99159			2.32894e-08			0.00841
	3.93697			0.98857			1.84806e-08			0.01143
	3.97899			0.98544			4.17533e-08			0.01456
	4.02101			0.98302			9.40229e-08			0.01698
	4.06303			0.98271			1.90107e-07			0.01729
	4.10504			0.98613			3.75341e-07			0.01387
	4.14706			0.98979			7.44903e-07			0.0102
	4.18908			0.97082			2.43487e-07			0.02918
	4.23109			0.92772			0.00119			0.07109
	4.27311			0.93024			0.00618			0.06358
	4.31513			0.93504			0.00188			0.06307
	4.35714			0.94636			0.000260263			0.05338
	4.39916			0.96313			4.92798e-05			0.03683
	4.44118			0.97327			1.1111e-05			0.02671
	4.48319			0.97845			4.39936e-06			0.02155
	4.52521			0.98087			3.97015e-06			0.01913
	4.56723			0.98176			3.0318e-06			0.01824
	4.60924			0.98208			1.17825e-06			0.01792
	4.65126			0.98245			3.05194e-07			0.01755
	4.69328			0.98286			7.55731e-07			0.01714
	4.73529			0.98331			8.86418e-07			0.01669
	4.77731			0.98413			2.47424e-07			0.01587
	4.81933			0.98523			1.67589e-07			0.01477
	4.86134			0.9864			5.34853e-07			0.0136
	4.90336			0.98786			2.36128e-07			0.01214
	4.94538			0.98948			7.74546e-08			0.01052
	4.98739			0.99104			3.88603e-07			0.00896
	5.02941			0.99271			1.35616e-07			0.00729
	5.07143			0.99426			1.11303e-07			0.00574
	5.11345			0.99562			3.10523e-07			0.00438
	5.15546			0.9968			2.69962e-08			0.0032
	5.19748			0.99759			2.27163e-07			0.00241
	5.2395			0.99803			1.40015e-07			0.00197
	5.28151			0.99797			8.07167e-08			0.00203
	5.32353			0.99738			2.25506e-07			0.00262
	5.36555			0.99619			1.55739e-08			0.00381
	5.40756			0.99439			2.2986e-07			0.00561
	5.44958			0.99188			1.73475e-08			0.00812
	5.4916			0.98878			1.96303e-07			0.01122
	5.53361			0.98492			3.79893e-08			0.01508
	5.57563			0.98054			1.63094e-07			0.01946
	5.61765			0.97542			5.17657e-08			0.02458
	5.65966			0.96992			1.44766e-07			0.03008
	5.70168			0.96377			5.21806e-08			0.03623
	5.7437			0.95744			1.43188e-07			0.04256
	5.78571			0.95062			4.05005e-08			0.04938
	5.82773			0.94378			1.55587e-07			0.05622
	5.86975			0.93672			2.17776e-08			0.06328
	5.91176			0.92975			1.74632e-07			0.07025
	5.95378			0.92293			7.56561e-09			0.07707
	5.9958			0.91617			1.84185e-07			0.08383
	6.03782			0.90999			1.94115e-08			0.09001
	6.07983			0.90387			1.59793e-07			0.09613
	6.12185			0.89856			7.99619e-08			0.10144
	6.16387			0.89352			9.02789e-08			0.10648
	6.20588			0.88916			1.77188e-07			0.11084
	6.2479			0.88554			2.21238e-08			0.11446
	6.28992			0.88227			2.28265e-07			0.11773
	6.33193			0.88005			5.90166e-08			0.11995
	6.37395			0.87821			1.47327e-07			0.12179
	6.41597			0.87707			2.14992e-07			0.12293
	6.45798			0.87681			3.65629e-08			0.12319
	6.5			0.87674			2.7566e-07			0.12326
