# Supplementary material for: Ultra-broadband infrared metamaterial absorber based on MDMDM structure for optical sensing
Source: Frontiers journal article supplement (doi:10.3389/fspas.2023.1338284), 2024-01-05
Supplement: Data_Sheet_2.XLSX [file Data_Sheet_2.XLSX]

## Sheet: Figure2_(A)
Wavelength (μm)	6.53		Permittivity (real)	-161.636		Permittivity (imag)	62.3708
	6.2			-124.101			48.0816
	5.9			-108.41			43.2888
	5.64			-94.4064			39.68
	5.39			-82.0125			36.7092
	5.17			-70.9555			34.8132
	4.96			-61.4075			33.21
	4.77			-52.8272			31.4496
	4.59			-44.7024			27.92
	4.43			-29.8776			16.159
	4.28			7.8589			25.398
	4.13			-57.9715			127.033
	4			-48.9769			56.664
	3.87			-43.0952			46.2186
	3.75			-38.6319			40.592
	3.65			-34.558			36.7728
	3.54			-31.0565			34.0308
	3.44			-28.036			31.6662
	3.35			-25.2144			29.267
	3.26			-22.2721			26.964
	3.18			-19.05			24.8992
	3.1			-15.7023			23.3064
	3.02			-12.1088			22.1184
	2.95			-8.6043			21.4124
	2.88			-5.248			21.1968
	2.82			-2.2236			21.328
	2.76			0.666			21.775
	2.7			3.37			22.5888
	2.64			5.6457			23.9624
	2.58			7.2821			25.482
	2.53			8.4816			27.027
	2.48			9.2565			28.5292
	2.38			10.1219			30.954
	2.3			10.1229			33.11
	2.21			9.4581			34.39
	2.14			8.7035			32.1708
	2.07			7.9712			35.5134
	2			7.0467			35.6956
	1.94			6.1056			35.696
	1.88			5.22			35.256
	1.82			4.5036			34.632
	1.77			4.0532			34.0764
	1.72			3.5303			33.6096
	1.68			3.0081			32.98
	1.63			2.4955			32.3532
	1.59			2.0696			31.647
	1.55			1.7292			30.8656
	1.51			1.0836			29.944
	1.48			2.2011			28.762

## Sheet: Figure2_(B)
Wavelength (μm)	1.4695		Permittivity (real)	2.0879		Permittivity (imag)	0
	1.5295			2.0859			0
	1.6606			2.0813			0
	1.681			2.0805			0
	1.6932			2.0801			0
	1.7091			2.0795			0
	1.8131			2.0756			0
	1.97			2.0693			0
	2.0581			2.0656			0
	2.1526			2.0614			0
	2.3254			2.0532			0
	2.4374			2.0476			0
	3.2439			1.9969			0
	3.2668			1.9952			0
	3.3026			1.9925			0
	3.422			1.9829			0
	3.507			1.9759			0
	3.5564			1.9717			0
	3.7067			1.9582			0
	3.846			1.946			0.0001383
	4.167			1.91269			0.000295962
	4.545			1.8632			0.0006988
	5			1.8009			0.01068
	5.556			1.7056			0.0147
	5.882			1.6332			0.01518
	6.25			1.5351			0.01615
	6.452			1.4689			0.01592
	6.667			1.3805			0.01682
