# Supplementary material for: Ultra-broadband infrared metamaterial absorber based on MDMDM structure for optical sensing
Source: Frontiers journal article supplement (doi:10.3389/fspas.2023.1338284), 2024-01-05
Supplement: Data_Sheet_3.XLSX [file Data_Sheet_3.XLSX]

## Sheet: Figure3_(A)
Wavelength(μm)	1.50104		S11(real)	0.30019		S11(imag)	-0.61502		S21(real)	-0.000128306		S21(imag)	3.59878e-05
	1.50491			0.28273			-0.64151			-0.000122475			4.30928e-05
	1.5088			0.26311			-0.66686			-0.000116547			4.98023e-05
	1.51271			0.22679			-0.74533			-0.000113116			5.45209e-05
	1.51665			0.20181			-0.76935			-0.00010964			6.40201e-05
	1.5206			0.17473			-0.79136			-0.000108359			6.91794e-05
	1.52457			0.14704			-0.81204			-0.000106635			7.44936e-05
	1.68774			-1.02205			-0.62309			5.50198e-05			0.000141309
	1.69264			-1.04958			-0.58884			5.95727e-05			0.000140791
	1.69756			-1.14255			-0.50779			6.13974e-05			0.000147276
	1.70251			-1.16543			-0.46599			6.64476e-05			0.000146683
	1.7075			-1.18712			-0.42198			7.14924e-05			0.000146088
	1.71251			-1.20636			-0.37744			7.65912e-05			0.000145132
	1.71755			-1.22404			-0.33089			8.17253e-05			0.000144168
	1.72262			-1.23988			-0.2837			8.70227e-05			0.000143
	1.72772			-1.25302			-0.23475			8.97799e-05			0.000136434
	1.73285			-1.19021			-0.31836			9.57602e-05			0.000134784
	1.73802			-1.20658			-0.27193			0.000101555			0.000133085
	1.74321			-1.22029			-0.22372			0.00010751			0.000131081
	1.74844			-1.23187			-0.17438			0.000113426			0.000128763
	1.75369			-1.24115			-0.12376			0.000119337			0.00012616
	1.75897			-1.24798			-0.07193			0.000128111			0.00012995
	1.76429			-1.2524			-0.01939			0.00013428			0.000126635
	1.76965			-1.26936			0.12281			0.000139101			0.000124293
	1.77503			-1.2621			0.17935			0.000144957			0.000120352
	1.78045			-1.25112			0.23547			0.000150529			0.00011581
	1.7859			-1.23757			0.29211			0.000147726			0.000107553
	1.79138			-1.22064			0.34915			0.000152392			0.00010303
	1.7969			-1.19951			0.4062			0.000156931			9.81661e-05
	1.80245			-1.17434			0.46195			0.00016106			9.2884e-05
	1.80803			-1.19586			0.33332			0.000163702			8.93358e-05
	1.81365			-1.1751			0.39021			0.000167145			8.3652e-05
	1.81931			-1.15158			0.44628			0.000178825			8.20413e-05
	1.825			-1.12392			0.50308			0.000182155			7.62931e-05
	1.83073			-1.09197			0.55741			0.000184745			7.03198e-05
	1.83649			-1.05617			0.61131			0.000186919			6.4519e-05
	1.84229			-1.01527			0.66389			0.000188806			5.86763e-05
	1.84812			-0.89552			0.80246			0.00018948			5.31389e-05
	1.9533			0.32159			0.75122			0.000285942			0.000115011
	1.95986			0.39682			0.66355			0.000318209			0.000111716
	1.96648			0.45989			0.55717			0.000330962			0.000103978
	1.97313			0.5082			0.42893			0.000368139			8.99707e-05
	1.97982			0.53479			0.27916			0.000406351			6.38833e-05
	1.98656			0.46998			-0.05874			0.000437382			1.7983e-05
	1.99334			0.33717			-0.25714			0.000445925			-5.1511e-05
	2.00019			-0.04243			-0.459			0.000316767			-0.000133148
	2.00706			-0.2191			-0.04386			0.000338452			3.86406e-05
	2.01399			-0.17534			0.06541			0.000414142			4.07344e-05
	2.02096			-0.145			0.11912			0.000468465			1.37792e-05
	2.02799			-0.11863			0.14831			0.000506732			-2.10747e-05
	2.03506			-0.05805			0.16204			0.000536424			-5.46492e-05
	2.04219			-0.04643			0.16724			0.000555853			-8.60439e-05
	2.04936			-0.03559			0.16599			0.000576165			-0.000128782
	2.05658			-0.02735			0.16053			0.000591173			-0.000173075
	2.06386			-0.02264			0.15152			0.000600717			-0.000218486
	2.07118			-0.01965			0.14182			0.000606206			-0.000263869
	2.07857			-0.01925			0.13033			0.000607069			-0.000311763
	2.086			-0.03184			0.12085			0.000612899			-0.000344977
	2.09348			-0.03476			0.11096			0.000606725			-0.000390558
	2.10102			-0.03821			0.10237			0.000598142			-0.00043464
	2.10861			-0.04307			0.09395			0.000586549			-0.000477998
	2.11625			-0.0485			0.0878			0.00057305			-0.000519265
	2.12397			-0.05288			0.08228			0.000558561			-0.000559531
	2.13173			-0.05908			0.07921			0.000543475			-0.000594692
	2.13954			-0.0696			0.07274			0.000524551			-0.000632517
	2.14741			-0.07522			0.0719			0.000505582			-0.000673035
	2.15534			-0.07905			0.07075			0.000487292			-0.000714717
	2.16335			-0.08422			0.07008			0.000466677			-0.000757302
	2.1714			-0.08739			0.07133			0.000445064			-0.000797911
	2.1795			-0.09032			0.07195			0.000435469			-0.000835417
	2.18767			-0.09373			0.07287			0.000411122			-0.000878471
	2.1959			-0.0943			0.07355			0.000394106			-0.000915588
	2.2042			-0.09637			0.07476			0.000367085			-0.000959552
	2.21257			-0.09824			0.07692			0.000337072			-0.001
	2.22099			-0.09821			0.07958			0.00030268			-0.00105
	2.22947			-0.09903			0.08142			0.000270239			-0.0011
	2.23802			-0.09879			0.08378			0.000230013			-0.00115
	2.24664			-0.09787			0.08609			0.000186637			-0.0012
	2.25533			-0.09973			0.08667			0.000152178			-0.00124
	2.26408			-0.09866			0.08801			0.000101628			-0.00129
	2.2729			-0.09643			0.09043			6.93269e-05			-0.00135
	2.28179			-0.09402			0.09124			1.20695e-05			-0.0014
	2.29074			-0.09172			0.09268			-5.03633e-05			-0.00145
	2.29977			-0.08885			0.09451			-0.00011622			-0.0015
	2.30888			-0.08509			0.09495			-0.000208569			-0.00156
	2.31805			-0.07117			0.09155			-0.000317661			-0.00162
	2.3273			-0.06715			0.09214			-0.000417972			-0.00169
	2.33661			-0.06234			0.09156			-0.000539793			-0.00174
	2.346			-0.05773			0.09123			-0.000671371			-0.0018
	2.35549			-0.05324			0.0902			-0.000812494			-0.00185
	2.36504			-0.04862			0.08896			-0.000963064			-0.00189
	2.37466			-0.0443			0.08747			-0.00112			-0.00192
	2.38436			-0.04159			0.08271			-0.00125			-0.00197
	2.39414			-0.03747			0.07957			-0.00145			-0.00197
	2.404			-0.03258			0.07645			-0.00165			-0.00195
	2.41396			-0.02852			0.07257			-0.00185			-0.00192
	2.42399			-0.02434			0.06879			-0.00207			-0.00188
	2.4341			-0.02101			0.06468			-0.00229			-0.00182
	2.44429			-0.01745			0.06039			-0.00252			-0.00176
	2.45457			-0.01289			0.05585			-0.00275			-0.00165
	2.46496			-0.01026			0.05128			-0.00299			-0.00154
	2.47541			-0.00745			0.04595			-0.00324			-0.00139
	2.48595			-0.00505			0.04037			-0.0035			-0.00121
	2.49659			-0.00274			0.034			-0.00378			-0.000969576
	2.50731			-0.000541983			0.0272			-0.00403			-0.000748405
	2.51813			0.000963683			0.02037			-0.0043			-0.000434942
	2.52906			0.00305			0.01082			-0.00455			-0.000119272
	2.54007			0.0031			0.00302			-0.00478			0.000327401
	2.55117			0.00282			-0.00466			-0.00496			0.000837282
	2.56237			0.00168			-0.01277			-0.0051			0.00139
	2.57367			0.000629256			-0.02095			-0.00521			0.00197
	2.58507			-0.00189			-0.02888			-0.00522			0.00261
	2.59659			-0.00497			-0.03696			-0.00511			0.00326
	2.6082			-0.00699			-0.04708			-0.00496			0.00387
	2.6199			-0.01116			-0.05437			-0.0047			0.00453
	2.63172			-0.01528			-0.06125			-0.00445			0.00511
	2.64364			-0.02067			-0.06854			-0.00402			0.00575
	2.65569			-0.02789			-0.07541			-0.00336			0.00635
	2.66783			-0.03526			-0.08165			-0.00261			0.00687
	2.68008			-0.04334			-0.08788			-0.00179			0.0073
	2.69244			-0.05283			-0.09263			-0.00088895			0.00761
	2.70492			-0.06212			-0.09713			5.49168e-05			0.00779
	2.71751			-0.07242			-0.10112			0.00103			0.0077
	2.73025			-0.08298			-0.10345			0.002			0.00747
	2.74308			-0.09375			-0.10565			0.00293			0.00712
	2.75604			-0.1033			-0.07604			0.00355			0.00625
	2.76911			-0.11335			-0.07764			0.00426			0.00566
	2.78231			-0.12074			-0.08148			0.00472			0.00507
	2.79566			-0.13119			-0.08126			0.0052			0.00432
	2.80912			-0.14167			-0.08022			0.00557			0.00354
	2.82271			-0.15202			-0.07828			0.00582			0.00274
	2.83642			-0.16263			-0.07484			0.00587			0.00192
	2.85028			-0.17282			-0.07044			0.00581			0.00113
	2.86426			-0.18273			-0.06519			0.00565			0.000413373
	2.87842			-0.18968			-0.06383			0.0054			-0.000204557
	2.89268			-0.19839			-0.05648			0.00509			-0.000768079
	2.90709			-0.20629			-0.04821			0.00472			-0.00125
	2.92164			-0.21355			-0.03922			0.00433			-0.00165
	2.93634			-0.2198			-0.02973			0.00392			-0.00198
	2.95122			-0.22521			-0.01964			0.00355			-0.00221
	2.96621			-0.22912			-0.00826			0.00309			-0.00237
	2.98137			-0.23301			0.000653822			0.00266			-0.00247
	2.99667			-0.23465			0.01222			0.00226			-0.00252
	3.01215			-0.23515			0.02387			0.00188			-0.00253
	3.02778			-0.23427			0.03519			0.00155			-0.0025
	3.04357			-0.23176			0.04629			0.00129			-0.00242
	3.05953			-0.22842			0.05685			0.00104			-0.00234
	3.07566			-0.22409			0.06691			0.000814361			-0.00224
	3.09196			-0.22007			0.07266			0.000631748			-0.00214
	3.10843			-0.214			0.08153			0.000463109			-0.00203
	3.12508			-0.20687			0.08937			0.000353231			-0.00191
	3.14191			-0.19921			0.09639			0.000232864			-0.00179
	3.15892			-0.19125			0.10257			0.000128828			-0.00168
	3.17612			-0.18292			0.10803			4.10882e-05			-0.00158
	3.1935			-0.17396			0.11221			-2.37164e-05			-0.00147
	3.21108			-0.16666			0.11344			-6.06892e-05			-0.00136
	3.22885			-0.15773			0.11598			-9.03065e-05			-0.00127
	3.24682			-0.14878			0.11767			-0.000125886			-0.00118
	3.26499			-0.1398			0.11852			-0.000154458			-0.0011
	3.28336			-0.13163			0.11843			-0.000171717			-0.00103
	3.30194			-0.12363			0.11771			-0.000186175			-0.000970921
	3.32073			-0.116			0.11647			-0.000197763			-0.000913936
	3.33974			-0.10342			0.1087			-0.000200729			-0.000862347
	3.35897			-0.09642			0.10651			-0.000207807			-0.000812971
	3.37842			-0.08984			0.10387			-0.000211071			-0.000765989
	3.3981			-0.08376			0.10068			-0.00021389			-0.000722812
	3.418			-0.07822			0.09735			-0.000215318			-0.000683045
	3.43814			-0.07308			0.09384			-0.000216166			-0.000646275
	3.45852			-0.06842			0.09001			-0.000216362			-0.000616899
	3.47915			-0.06596			0.08327			-0.000213753			-0.00058559
	3.50002			-0.06208			0.07943			-0.000215655			-0.000555911
	3.52114			-0.05855			0.07553			-0.000216957			-0.000528443
	3.54252			-0.05558			0.07149			-0.000217785			-0.000502369
	3.56416			-0.05302			0.06725			-0.000215574			-0.000474726
	3.58607			-0.05093			0.06307			-0.000205918			-0.000451844
	3.60825			-0.04921			0.059			-0.000203597			-0.000428478
	3.6307			-0.04872			0.0535			-0.000197116			-0.000407932
	3.65343			-0.04773			0.04958			-0.000194055			-0.000387558
	3.67645			-0.04835			0.04536			-0.000179205			-0.000360075
	3.69977			-0.04937			0.04168			-0.000165776			-0.000335683
	3.72338			-0.05074			0.0385			-0.00015444			-0.000315777
	3.74729			-0.0523			0.0359			-0.000143483			-0.000296062
	3.77151			-0.05458			0.0344			-0.000127779			-0.000278914
	3.79605			-0.05446			0.03068			-0.000113354			-0.000262814
	3.82091			-0.05651			0.03071			-0.000100183			-0.00024916
	3.8461			-0.05833			0.0313			-8.47432e-05			-0.000238405
	3.87162			-0.0598			0.03234			-7.46599e-05			-0.000227153
	3.89748			-0.06242			0.03636			-5.11553e-05			-0.000210434
	3.92369			-0.06391			0.04099			-3.15766e-05			-0.000194302
	3.95026			-0.06421			0.04593			-1.57441e-05			-0.000179247
	3.97719			-0.06333			0.04813			-1.51899e-06			-0.000165225
	4.00449			-0.06044			0.05527			1.54193e-05			-0.000148314
	4.03216			-0.03522			0.08286			7.17678e-05			-6.09017e-05
	4.06022			0.000859609			0.0952			6.12199e-05			-2.92334e-06
	4.08867			0.04016			0.09604			3.55386e-05			2.07348e-05
	4.11753			0.07918			0.08818			1.43513e-05			2.45658e-05
	4.14679			0.07477			0.06908			1.90519e-05			3.38625e-05
	4.17648			0.02653			0.04202			0.000100643			6.47483e-05
	4.20658			-0.00941			0.02555			0.000431021			2.02784e-05
	4.23713			-0.03254			0.03922			0.00178			-0.00088562
	4.26813			-0.05021			0.14011			0.00926			-0.01062
	4.29958			-0.06048			0.20743			0.00962			-0.03533
	4.3315			-0.01036			0.19743			-0.01365			-0.02149
	4.3639			0.08565			0.19061			-0.01552			-0.00305
	4.39678			0.1885			0.12352			-0.00768			0.00435
	4.43017			0.24626			-0.00857			-0.00205			0.00415
	4.46407			0.20162			-0.06456			-0.00152			0.00276
	4.49849			0.15114			-0.09564			-0.00128			0.00186
	4.53343			0.10233			-0.11239			-0.00107			0.00126
	4.56894			0.05704			-0.11624			-0.000924782			0.000851809
	4.605			0.0243			-0.11315			-0.000797387			0.000633962
	4.64163			0.01397			-0.11658			-0.000726381			0.000568996
	4.67886			-0.00153			-0.11411			-0.000665952			0.00051749
	4.71668			-0.01575			-0.10939			-0.000615329			0.000472154
	4.75512			-0.02836			-0.10265			-0.000572684			0.000431694
	4.79419			-0.04025			-0.09555			-0.000533539			0.000396536
	4.83391			-0.05147			-0.08768			-0.000491932			0.000375155
	4.8743			-0.06089			-0.07802			-0.000457049			0.000355535
	4.91537			-0.06543			-0.07217			-0.000428465			0.000333651
	4.95712			-0.07057			-0.05974			-0.000404111			0.000318354
	4.9996			-0.07409			-0.04567			-0.000384974			0.000301877
	5.04281			-0.07449			-0.03048			-0.000363442			0.000288683
	5.08678			-0.07165			-0.01517			-0.000345484			0.000277642
	5.13152			-0.06553			-0.000351423			-0.000330172			0.000268297
	5.17705			-0.05612			0.0136			-0.000316911			0.000260717
	5.2234			-0.04295			0.02689			-0.000299196			0.000250111
	5.27058			-0.02535			0.03912			-0.000288489			0.000238113
	5.31863			-0.00457			0.04774			-0.000276201			0.000231582
	5.36756			0.01873			0.05221			-0.000264859			0.000226503
	5.41739			0.04458			0.05153			-0.000254433			0.000220592
	5.46817			0.07199			0.04479			-0.000244415			0.000213775
	5.5199			0.09851			0.03215			-0.000235238			0.000207552
	5.57262			0.12526			0.01241			-0.000229702			0.000196819
	5.62636			0.14794			-0.01273			-0.000222525			0.000191009
	5.68114			0.16747			-0.04472			-0.000214412			0.000182009
	5.737			0.18097			-0.08227			-0.000207059			0.000171695
	5.79398			0.1865			-0.12316			-0.000201767			0.000161742
	5.85209			0.18358			-0.16526			-0.000198545			0.000152381
	5.91139			0.17127			-0.20778			-0.000203078			0.000142905
	5.9719			0.15233			-0.25064			-0.000205293			0.000131414
	6.03364			0.12076			-0.2879			-0.000209861			0.000123036
	6.09669			0.08152			-0.31859			-0.000216742			0.000116511
	6.16108			0.03663			-0.34094			-0.000225988			0.000112189
	6.22683			-0.01348			-0.35472			-0.000236868			0.000109332
	6.29401			-0.07107			-0.35862			-0.0002524			0.000105723
	6.36263			-0.13148			-0.34955			-0.000267621			0.000107784
	6.43278			-0.19831			-0.32995			-0.000281845			0.000114065
	6.5045			-0.25505			-0.29018			-0.000300873			0.000125248

## Sheet: Figure3_(B)
Wavelength(μm)	1.50104		Z_real	0.612496		Z_imag	-1.41712
	1.50491			0.54916			-1.38553
	1.5088			0.492119			-1.35032
	1.51271			0.340783			-1.29244
	1.51665			0.298919			-1.25199
	1.5206			0.262536			-1.21066
	1.52457			0.22998			-1.17097
	1.68774			0.0966795			0.278356
	1.69264			0.0985926			0.258972
	1.69756			0.116177			0.209468
	1.70251			0.117274			0.189958
	1.7075			0.118374			0.1701
	1.71251			0.119303			0.15066
	1.71755			0.12021			0.130894
	1.72262			0.121193			0.111308
	1.72772			0.121836			0.0914989
	1.73285			0.10574			0.129986
	1.73802			0.107179			0.110028
	1.74321			0.10827			0.0898521
	1.74844			0.109328			0.0695898
	1.75369			0.110314			0.0491299
	1.75897			0.111222			0.0284387
	1.76429			0.112124			0.00764334
	1.76965			0.121268			-0.047554
	1.77503			0.121389			-0.0696605
	1.78045			0.121169			-0.0919269
	1.7859			0.121151			-0.114732
	1.79138			0.121086			-0.138191
	1.7969			0.120696			-0.162388
	1.80245			0.119906			-0.186981
	1.80803			0.109709			-0.135142
	1.81365			0.109172			-0.159813
	1.81931			0.108793			-0.184854
	1.825			0.108369			-0.211195
	1.83073			0.107339			-0.237851
	1.83649			0.106311			-0.265698
	1.84229			0.104735			-0.294927
	1.84812			0.105241			-0.378792
	1.9533			0.32428			1.46641
	1.95986			0.500215			1.65037
	1.96648			0.793917			1.85058
	1.97313			1.30974			2.01447
	1.97982			2.16092			1.89679
	1.98656			2.72766			-0.413122
	1.99334			1.62266			-1.01744
	2.00019			0.607025			-0.707601
	2.00706			0.638434			-0.0589465
	2.01399			0.696381			0.094407
	2.02096			0.728022			0.179775
	2.02799			0.757016			0.232949
	2.03506			0.84695			0.28286
	2.04219			0.863658			0.297849
	2.04936			0.882892			0.3018
	2.05658			0.900357			0.296943
	2.06386			0.913711			0.283546
	2.07118			0.924233			0.267636
	2.07857			0.93066			0.246871
	2.086			0.912057			0.223942
	2.09348			0.910843			0.204905
	2.10102			0.907844			0.188118
	2.10861			0.901987			0.171313
	2.11625			0.894204			0.158618
	2.12397			0.888022			0.147544
	2.13173			0.877927			0.140453
	2.13954			0.86125			0.126578
	2.14741			0.851804			0.12383
	2.15534			0.845548			0.121007
	2.16335			0.83697			0.118735
	2.1714			0.831386			0.120134
	2.1795			0.826371			0.120522
	2.18767			0.820524			0.121293
	2.1959			0.819433			0.122288
	2.2042			0.815759			0.123814
	2.21257			0.812206			0.126926
	2.22099			0.811633			0.131277
	2.22947			0.809854			0.13408
	2.23802			0.809664			0.137982
	2.24664			0.810576			0.141977
	2.25533			0.807403			0.142442
	2.26408			0.808793			0.144896
	2.2729			0.811778			0.149429
	2.28179			0.815493			0.15141
	2.29074			0.818864			0.154409
	2.29977			0.823066			0.158238
	2.30888			0.82916			0.160059
	2.31805			0.853578			0.15842
	2.3273			0.860283			0.16062
	2.33661			0.868755			0.161062
	2.346			0.876879			0.161882
	2.35549			0.885077			0.161438
	2.36504			0.89364			0.160647
	2.37466			0.901816			0.159294
	2.38436			0.908109			0.151517
	2.39414			0.916493			0.146987
	2.404			0.926336			0.142621
	2.41396			0.934908			0.136522
	2.42399			0.94371			0.13053
	2.4341			0.951014			0.123595
	2.44429			0.958797			0.116263
	2.45457			0.968562			0.108545
	2.46496			0.9746			0.10023
	2.47541			0.981088			0.0903584
	2.48595			0.986744			0.0798026
	2.49659			0.992244			0.067552
	2.50731			0.99744			0.0543018
	2.51813			1.0011			0.0408024
	2.52906			1.00588			0.0217705
	2.54007			1.0062			0.00607769
	2.55117			1.00561			-0.00937285
	2.56237			1.00304			-0.0256225
	2.57367			1.00038			-0.0419353
	2.58507			0.994568			-0.0574955
	2.59659			0.987418			-0.0730924
	2.6082			0.981781			-0.0926548
	2.6199			0.97222			-0.106045
	2.63172			0.962752			-0.118407
	2.64364			0.950696			-0.130989
	2.65569			0.935314			-0.141975
	2.66783			0.919938			-0.151415
	2.68008			0.903418			-0.160314
	2.69244			0.885055			-0.16584
	2.70492			0.867418			-0.170764
	2.71751			0.848517			-0.174292
	2.73025			0.83007			-0.174811
	2.74308			0.811681			-0.174998
	2.75604			0.804183			-0.12435
	2.76911			0.787694			-0.124673
	2.78231			0.775158			-0.129067
	2.79566			0.758975			-0.126368
	2.80912			0.743213			-0.122499
	2.82271			0.728098			-0.117435
	2.83642			0.713133			-0.110285
	2.85028			0.699155			-0.102058
	2.86426			0.685873			-0.0929264
	2.87842			0.67629			-0.08994
	2.89268			0.665199			-0.0784803
	2.90709			0.655325			-0.0661537
	2.92164			0.646332			-0.0532033
	2.93634			0.638636			-0.0399338
	2.95122			0.631951			-0.0261553
	2.96621			0.627106			-0.0109299
	2.98137			0.622046			0.000864374
	2.99667			0.619734			0.0160351
	3.01215			0.618633			0.0312841
	3.02778			0.619076			0.0461635
	3.04357			0.621405			0.0609348
	3.05953			0.62463			0.0751874
	3.07566			0.629001			0.0890436
	3.09196			0.633458			0.0972794
	3.10843			0.640051			0.110143
	3.12508			0.648143			0.122047
	3.14191			0.65706			0.133191
	3.15892			0.666554			0.143495
	3.17612			0.676748			0.153128
	3.1935			0.688213			0.161363
	3.21108			0.69824			0.165128
	3.22885			0.710354			0.171341
	3.24682			0.722901			0.176477
	3.26499			0.735924			0.180507
	3.28336			0.748215			0.182958
	3.30194			0.760624			0.18444
	3.32073			0.772806			0.185017
	3.33974			0.795126			0.176841
	3.35897			0.807066			0.175544
	3.37842			0.818612			0.173327
	3.3981			0.829637			0.169971
	3.418			0.83991			0.166121
	3.43814			0.849649			0.16175
	3.45852			0.858731			0.15659
	3.47915			0.864863			0.145678
	3.50002			0.872624			0.140048
	3.52114			0.879807			0.134129
	3.54252			0.886042			0.127734
	3.56416			0.891584			0.120804
	3.58607			0.896247			0.1138
	3.60825			0.900187			0.106853
	3.6307			0.902136			0.0970366
	3.65343			0.904624			0.0901293
	3.67645			0.904195			0.0823907
	3.69977			0.902903			0.0755815
	3.72338			0.900868			0.0696494
	3.74729			0.898389			0.064765
	3.77151			0.894474			0.061797
	3.79605			0.895101			0.0551388
	3.82091			0.891427			0.0549789
	3.8461			0.888118			0.0558409
	3.87162			0.885393			0.0575331
	3.89748			0.880292			0.0643507
	3.92369			0.877072			0.0723193
	3.95026			0.875834			0.0809587
	3.97719			0.877038			0.0849612
	4.00449			0.8809			0.0980323
	4.03216			0.919658			0.153651
	4.06022			0.983711			0.189012
	4.08867			1.06303			0.206423
	4.11753			1.15224			0.206104
	4.14679			1.14964			0.160498
	4.17648			1.05069			0.0885182
	4.20658			0.980087			0.0501196
	4.23713			0.93418			0.0734683
	4.26813			0.871125			0.249646
	4.29958			0.816883			0.355113
	4.3315			0.906539			0.372399
	4.3639			1.0962			0.437101
	4.39678			1.40882			0.366637
	4.43017			1.65308			-0.0301805
	4.46407			1.48879			-0.201257
	4.49849			1.32656			-0.262132
	4.53343			1.1936			-0.274644
	4.56894			1.08923			-0.257543
	4.605			1.02261			-0.234558
	4.64163			1.00037			-0.236508
	4.67886			0.971354			-0.224608
	4.71668			0.946414			-0.209617
	4.75512			0.925657			-0.192217
	4.79419			0.906529			-0.17512
	4.83391			0.888964			-0.157517
	4.8743			0.875068			-0.137896
	4.91537			0.868602			-0.126575
	4.95712			0.862364			-0.103924
	4.9996			0.858681			-0.0790306
	5.04281			0.859852			-0.0527583
	5.08678			0.865907			-0.0264133
	5.13152			0.877			-0.000619034
	5.17705			0.89341			0.0243821
	5.2234			0.916364			0.0494089
	5.27058			0.947718			0.074311
	5.31863			0.986415			0.0944001
	5.36756			1.03242			0.108138
	5.41739			1.08725			0.112574
	5.46817			1.15014			0.103776
	5.5199			1.21573			0.07902
	5.57262			1.28593			0.0324307
	5.62636			1.34673			-0.0350608
	5.68114			1.3954			-0.128671
	5.737			1.41752			-0.242835
	5.79398			1.40342			-0.363867
	5.85209			1.3533			-0.476355
	5.91139			1.2706			-0.569287
	5.9719			1.16972			-0.641544
	6.03364			1.05442			-0.672703
	6.09669			0.943657			-0.67419
	6.16108			0.844968			-0.65294
	6.22683			0.758037			-0.615316
	6.29401			0.679057			-0.562189
	6.36263			0.613597			-0.498491
	6.43278			0.551397			-0.427171
	6.5045			0.512696			-0.34975

## Sheet: Figure3_(C)
Wavelength(μm)	1.50104		RL	-3.29419
	1.50491			-3.08501
	1.5088			-2.89097
	1.51271			-2.16848
	1.51665			-1.98848
	1.5206			-1.82577
	1.52457			-1.66831
	1.68774			-1.56193
	1.69264			-1.60869
	1.69756			-1.94032
	1.70251			-1.97385
	1.7075			-2.00664
	1.71251			-2.03513
	1.71755			-2.06219
	1.72262			-2.08918
	1.72772			-2.10898
	1.73285			-1.8126
	1.73802			-1.84627
	1.74321			-1.87284
	1.74844			-1.89745
	1.75369			-1.91947
	1.75897			-1.93857
	1.76429			-1.95594
	1.76965			-2.11216
	1.77503			-2.10871
	1.78045			-2.09717
	1.7859			-2.08685
	1.79138			-2.07329
	1.7969			-2.05155
	1.80245			-2.02069
	1.80803			-1.87851
	1.81365			-1.85575
	1.81931			-1.83356
	1.825			-1.80778
	1.83073			-1.76992
	1.83649			-1.72946
	1.84229			-1.6777
	1.84812			-1.60135
	1.9533			-1.75389
	1.95986			-2.23468
	1.96648			-2.82382
	1.97313			-3.5433
	1.97982			-4.38983
	1.98656			-6.49113
	1.99334			-7.452
	2.00019			-6.72675
	2.00706			-13.0167
	2.01399			-14.5566
	2.02096			-14.5329
	2.02799			-14.4285
	2.03506			-15.2831
	2.04219			-15.2107
	2.04936			-15.4029
	2.05658			-15.7646
	2.06386			-16.2945
	2.07118			-16.883
	2.07857			-17.6056
	2.086			-18.0635
	2.09348			-18.6904
	2.10102			-19.2298
	2.10861			-19.7135
	2.11625			-19.9731
	2.12397			-20.1927
	2.13173			-20.1036
	2.13954			-19.9415
	2.14741			-19.655
	2.15534			-19.4865
	2.16335			-19.2069
	2.1714			-18.9538
	2.1795			-18.7504
	2.18767			-18.5095
	2.1959			-18.4461
	2.2042			-18.2749
	2.21257			-18.0777
	2.22099			-17.9647
	2.22947			-17.8423
	2.23802			-17.7527
	2.24664			-17.698
	2.25533			-17.5801
	2.26408			-17.5743
	2.2729			-17.5755
	2.28179			-17.6534
	2.29074			-17.6946
	2.29977			-17.74
	2.30888			-17.89
	2.31805			-18.7136
	2.3273			-18.8606
	2.33661			-19.1121
	2.346			-19.3345
	2.35549			-19.5977
	2.36504			-19.8812
	2.37466			-20.1715
	2.38436			-20.6694
	2.39414			-21.1153
	2.404			-21.608
	2.41396			-22.1612
	2.42399			-22.7373
	2.4341			-23.3494
	2.44429			-24.0331
	2.45457			-24.834
	2.46496			-25.6305
	2.47541			-26.641
	2.48595			-27.8118
	2.49659			-29.3428
	2.50731			-31.3059
	2.51813			-33.8123
	2.52906			-38.981
	2.54007			-47.2744
	2.55117			-45.2727
	2.56237			-37.8044
	2.57367			-33.5712
	2.58507			-30.768
	2.59659			-28.5679
	2.6082			-26.4483
	2.6199			-25.1136
	2.63172			-23.9958
	2.64364			-22.9038
	2.65569			-21.8945
	2.66783			-21.0183
	2.68008			-20.1769
	2.69244			-19.4424
	2.70492			-18.7645
	2.71751			-18.1058
	2.73025			-17.5485
	2.74308			-17.0005
	2.75604			-17.8378
	2.76911			-17.241
	2.78231			-16.733
	2.79566			-16.2317
	2.80912			-15.7667
	2.82271			-15.3401
	2.83642			-14.9417
	2.85028			-14.5803
	2.86426			-14.2431
	2.87842			-13.9735
	2.89268			-13.711
	2.90709			-13.4792
	2.92164			-13.266
	2.93634			-13.0808
	2.95122			-12.9152
	2.96621			-12.7933
	2.98137			-12.6524
	2.99667			-12.58
	3.01215			-12.5285
	3.02778			-12.5088
	3.04357			-12.5293
	3.05953			-12.5642
	3.07566			-12.6209
	3.09196			-12.6996
	3.10843			-12.8031
	3.12508			-12.943
	3.14191			-13.1001
	3.15892			-13.27
	3.17612			-13.4556
	3.1935			-13.6803
	3.21108			-13.9101
	3.22885			-14.1648
	3.24682			-14.4391
	3.26499			-14.7377
	3.28336			-15.0373
	3.30194			-15.355
	3.32073			-15.6831
	3.33974			-16.4762
	3.35897			-16.8528
	3.37842			-17.2449
	3.3981			-17.6566
	3.418			-18.0701
	3.43814			-18.4936
	3.45852			-18.9339
	3.47915			-19.4751
	3.50002			-19.9297
	3.52114			-20.3941
	3.54252			-20.862
	3.56416			-21.3474
	3.58607			-21.8228
	3.60825			-22.2893
	3.6307			-22.8101
	3.65343			-23.245
	3.67645			-23.5702
	3.69977			-23.7938
	3.72338			-23.9181
	3.74729			-23.9534
	3.77151			-23.8064
	3.79605			-24.0812
	3.82091			-23.8331
	3.8461			-23.5837
	3.87162			-23.3512
	3.89748			-22.825
	3.92369			-22.3921
	3.95026			-22.0535
	3.97719			-21.9876
	4.00449			-21.7338
	4.03216			-20.9117
	4.06022			-20.427
	4.08867			-19.6513
	4.11753			-18.525
	4.14679			-19.8457
	4.17648			-26.0746
	4.20658			-31.3008
	4.23713			-25.8542
	4.26813			-16.546
	4.29958			-13.3179
	4.3315			-14.0822
	4.3639			-13.5963
	4.39678			-12.9421
	4.43017			-12.1671
	4.46407			-13.4853
	4.49849			-14.9497
	4.53343			-16.3634
	4.56894			-17.7555
	4.605			-18.731
	4.64163			-18.606
	4.67886			-18.8525
	4.71668			-19.1311
	4.75512			-19.4535
	4.79419			-19.6858
	4.83391			-19.8558
	4.8743			-20.0898
	4.91537			-20.2276
	4.95712			-20.6805
	4.9996			-21.2065
	5.04281			-21.8854
	5.08678			-22.705
	5.13152			-23.6713
	5.17705			-24.7704
	5.2234			-25.9054
	5.27058			-26.6295
	5.31863			-26.383
	5.36756			-25.1189
	5.41739			-23.3329
	5.46817			-21.4335
	5.5199			-19.6909
	5.57262			-18.0012
	5.62636			-16.5664
	5.68114			-15.222
	5.737			-14.0321
	5.79398			-13.0147
	5.85209			-12.1459
	5.91139			-11.3962
	5.9719			-10.6537
	6.03364			-10.1114
	6.09669			-9.66001
	6.16108			-9.29668
	6.22683			-8.99602
	6.29401			-8.74009
	6.36263			-8.55501
	6.43278			-8.29167
	6.5045			-8.26071

## Sheet: Figure3_(D)
Wavelength(μm)/ (sim)	1.5		A(simulation)	0.60041		Wavelength(μm)/(cal)	1.50104		A(calculation)	0.531636
	1.54202			0.53126			1.50491			0.508529
	1.58403			0.48254			1.5088			0.486071
	1.62605			0.46292			1.51271			0.393049
	1.66807			0.47008			1.51665			0.367373
	1.71008			0.49477			1.5206			0.343219
	1.7521			0.52848			1.52457			0.31897
	1.79412			0.56645			1.68774			0.302079
	1.83613			0.60614			1.69264			0.309559
	1.87815			0.64613			1.69756			0.360316
	1.92017			0.68772			1.70251			0.36523
	1.96218			0.73551			1.7075			0.370008
	2.0042			0.8714			1.71251			0.374126
	2.04622			0.94244			1.71755			0.378017
	2.08824			0.9694			1.72262			0.381872
	2.13025			0.98845			1.72772			0.384678
	2.17227			0.98235			1.73285			0.341218
	2.21429			0.97612			1.73802			0.346312
	2.2563			0.97378			1.74321			0.350294
	2.29832			0.9747			1.74844			0.353968
	2.34034			0.97785			1.75369			0.357231
	2.38235			0.98213			1.75897			0.360052
	2.42437			0.98665			1.76429			0.362603
	2.46639			0.99071			1.76965			0.385129
	2.5084			0.9936			1.77503			0.384639
	2.55042			0.99508			1.78045			0.383001
	2.59244			0.99494			1.7859			0.381536
	2.63445			0.99322			1.79138			0.379602
	2.67647			0.99003			1.7969			0.37649
	2.71849			0.98567			1.80245			0.372046
	2.7605			0.98051			1.80803			0.351148
	2.80252			0.9749			1.81365			0.347737
	2.84454			0.9692			1.81931			0.344392
	2.88655			0.96375			1.825			0.340494
	2.92857			0.95885			1.83073			0.33471
	2.97059			0.95476			1.83649			0.328496
	3.01261			0.9517			1.84229			0.320432
	3.05462			0.94973			1.84812			0.308388
	3.09664			0.94894			1.9533			0.332248
	3.13866			0.94943			1.95986			0.402235
	3.18067			0.95099			1.96648			0.478063
	3.22269			0.95361			1.97313			0.557752
	3.26471			0.95707			1.97982			0.636069
	3.30672			0.96123			1.98656			0.775668
	3.34874			0.96581			1.99334			0.820195
	3.39076			0.97071			2.00019			0.787519
	3.43277			0.97556			2.00706			0.950071
	3.47479			0.98029			2.01399			0.964977
	3.51681			0.98469			2.02096			0.964785
	3.55882			0.98854			2.02799			0.963931
	3.60084			0.99176			2.03506			0.970373
	3.64286			0.99428			2.04219			0.969875
	3.68487			0.99601			2.04936			0.971181
	3.72689			0.99686			2.05658			0.973482
	3.76891			0.99681			2.06386			0.976529
	3.81092			0.99587			2.07118			0.979501
	3.85294			0.9941			2.07857			0.982644
	3.89496			0.99159			2.086			0.984381
	3.93697			0.98857			2.09348			0.98648
	3.97899			0.98544			2.10102			0.98806
	4.02101			0.98302			2.10861			0.989318
	4.06303			0.98271			2.11625			0.989939
	4.10504			0.98613			2.12397			0.990434
	4.14706			0.9898			2.13173			0.990235
	4.18908			0.97082			2.13954			0.989865
	4.23109			0.92891			2.14741			0.989172
	4.27311			0.93642			2.15534			0.988746
	4.31513			0.93693			2.16335			0.987996
	4.35714			0.94662			2.1714			0.987275
	4.39916			0.96317			2.1795			0.986666
	4.44118			0.97329			2.18767			0.985905
	4.48319			0.97845			2.1959			0.985698
	4.52521			0.98087			2.2042			0.985124
	4.56723			0.98176			2.21257			0.984432
	4.60924			0.98208			2.22099			0.984022
	4.65126			0.98245			2.22947			0.983564
	4.69328			0.98286			2.23802			0.983221
	4.73529			0.98331			2.24664			0.98301
	4.77731			0.98413			2.25533			0.982542
	4.81933			0.98523			2.26408			0.982521
	4.86134			0.9864			2.2729			0.982524
	4.90336			0.98786			2.28179			0.982836
	4.94538			0.98948			2.29074			0.982998
	4.98739			0.99104			2.29977			0.983174
	5.02941			0.99271			2.30888			0.983744
	5.07143			0.99426			2.31805			0.986553
	5.11345			0.99562			2.3273			0.987001
	5.15546			0.9968			2.33661			0.987731
	5.19748			0.99759			2.346			0.988344
	5.2395			0.99803			2.35549			0.98903
	5.28151			0.99797			2.36504			0.989722
	5.32353			0.99738			2.37466			0.990387
	5.36555			0.99619			2.38436			0.991429
	5.40756			0.99439			2.39414			0.992265
	5.44958			0.99188			2.404			0.993094
	5.4916			0.98878			2.41396			0.99392
	5.53361			0.98492			2.42399			0.994675
	5.57563			0.98054			2.4341			0.995375
	5.61765			0.97542			2.44429			0.996049
	5.65966			0.96992			2.45457			0.996715
	5.70168			0.96377			2.46496			0.997265
	5.7437			0.95744			2.47541			0.997833
	5.78571			0.95062			2.48595			0.998345
	5.82773			0.94378			2.49659			0.998836
	5.86975			0.93672			2.50731			0.99926
	5.91176			0.92975			2.51813			0.999584
	5.95378			0.92293			2.52906			0.999874
	5.9958			0.91617			2.54007			0.999981
	6.03782			0.90999			2.55117			0.99997
	6.07983			0.90387			2.56237			0.999834
	6.12185			0.89856			2.57367			0.999561
	6.16387			0.89352			2.58507			0.999162
	6.20588			0.88916			2.59659			0.998609
	6.2479			0.88554			2.6082			0.997735
	6.28992			0.88227			2.6199			0.996919
	6.33193			0.88005			2.63172			0.996015
	6.37395			0.87822			2.64364			0.994875
	6.41597			0.87707			2.65569			0.993536
	6.45798			0.87681			2.66783			0.992091
	6.5			0.87674			2.68008			0.9904
							2.69244			0.98863
							2.70492			0.986708
							2.71751			0.984532
							2.73025			0.982414
							2.74308			0.980051
							2.75604			0.983548
							2.76911			0.981124
							2.78231			0.978783
							2.79566			0.976186
							2.80912			0.973493
							2.82271			0.970761
							2.83642			0.967948
							2.85028			0.965169
							2.86426			0.962358
							2.87842			0.959945
							2.89268			0.957449
							2.90709			0.955118
							2.92164			0.952857
							2.93634			0.950803
							2.95122			0.948894
							2.96621			0.947435
							2.98137			0.945706
							2.99667			0.94479
							3.01215			0.944135
							3.02778			0.94388
							3.04357			0.944145
							3.05953			0.944593
							3.07566			0.945307
							3.09196			0.94629
							3.10843			0.947557
							3.12508			0.949218
							3.14191			0.951025
							3.15892			0.952903
							3.17612			0.95487
							3.1935			0.957147
							3.21108			0.959356
							3.22885			0.96167
							3.24682			0.964018
							3.26499			0.966409
							3.28336			0.968648
							3.30194			0.97086
							3.32073			0.972979
							3.33974			0.977489
							3.35897			0.979359
							3.37842			0.98114
							3.3981			0.982848
							3.418			0.984405
							3.43814			0.985853
							3.45852			0.987217
							3.47915			0.988715
							3.50002			0.989837
							3.52114			0.990867
							3.54252			0.9918
							3.56416			0.992666
							3.58607			0.993428
							3.60825			0.994097
							3.6307			0.994764
							3.65343			0.995264
							3.67645			0.995605
							3.69977			0.995825
							3.72338			0.995943
							3.74729			0.995976
							3.77151			0.995838
							3.79605			0.996093
							3.82091			0.995864
							3.8461			0.995618
							3.87162			0.995378
							3.89748			0.994782
							3.92369			0.994235
							3.95026			0.993768
							3.97719			0.993673
							4.00449			0.993292
							4.03216			0.991894
							4.06022			0.990936
							4.08867			0.989163
							4.11753			0.985955
							4.14679			0.989637
							4.17648			0.99753
							4.20658			0.999259
							4.23713			0.997403
							4.26813			0.977849
							4.29958			0.95342
							4.3315			0.960935
							4.3639			0.956313
							4.39678			0.949206
							4.43017			0.939284
							4.46407			0.955182
							4.49849			0.96801
							4.53343			0.976897
							4.56894			0.983235
							4.605			0.986607
							4.64163			0.986214
							4.67886			0.986977
							4.71668			0.987786
							4.75512			0.988659
							4.79419			0.98925
							4.83391			0.989663
							4.8743			0.990205
							4.91537			0.99051
							4.95712			0.991451
							4.9996			0.992425
							5.04281			0.993522
							5.08678			0.994636
							5.13152			0.995706
							5.17705			0.996666
							5.2234			0.997432
							5.27058			0.997827
							5.31863			0.9977
							5.36756			0.996923
							5.41739			0.995357
							5.46817			0.992811
							5.5199			0.989262
							5.57262			0.984156
							5.62636			0.977952
							5.68114			0.969954
							5.737			0.960482
							5.79398			0.950049
							5.85209			0.938988
							5.91139			0.927494
							5.9719			0.913975
							6.03364			0.902531
							6.09669			0.891855
							6.16108			0.882418
							6.22683			0.873992
							6.29401			0.866341
							6.36263			0.860528
							6.43278			0.851806
							6.5045			0.850745
