# Supplementary material for: Ultra-broadband infrared metamaterial absorber based on MDMDM structure for optical sensing
Source: Frontiers journal article supplement (doi:10.3389/fspas.2023.1338284), 2024-01-05
Supplement: Data_Sheet_4.XLSX [file Data_Sheet_4.XLSX]

## Sheet: Figurer5_(A)
Wavelength(μm)	1.5		Absorption (case1)	0.356465		Absorption (case2)	0.409553		Absorption (case3)	0.60041
	1.54202			0.351669			0.407672			0.53125
	1.58403			0.360876			0.422299			0.48254
	1.62605			0.380775			0.447287			0.46292
	1.66807			0.406001			0.47865			0.47008
	1.71008			0.435358			0.512194			0.49476
	1.7521			0.465767			0.545135			0.52848
	1.79412			0.496256			0.576732			0.56645
	1.83613			0.527135			0.606988			0.60614
	1.87815			0.559175			0.63732			0.64613
	1.92017			0.59369			0.668371			0.68772
	1.96218			0.633942			0.704927			0.73551
	2.0042			0.714937			0.818454			0.8714
	2.04622			0.726694			0.855883			0.94244
	2.08824			0.738321			0.911629			0.9694
	2.13025			0.750124			0.926199			0.98845
	2.17227			0.762297			0.936006			0.98235
	2.21429			0.774434			0.944365			0.97612
	2.2563			0.787508			0.95165			0.97377
	2.29832			0.802402			0.958957			0.9747
	2.34034			0.818752			0.96559			0.97785
	2.38235			0.836703			0.971425			0.98213
	2.42437			0.856198			0.976358			0.98665
	2.46639			0.876446			0.980248			0.9907
	2.5084			0.896299			0.98302			0.99359
	2.55042			0.914744			0.984667			0.99507
	2.59244			0.931216			0.985214			0.99493
	2.63445			0.945607			0.984709			0.99321
	2.67647			0.958072			0.983281			0.99001
	2.71849			0.968822			0.981145			0.98565
	2.7605			0.978018			0.978301			0.98049
	2.80252			0.985732			0.97486			0.97488
	2.84454			0.991933			0.970948			0.96918
	2.88655			0.996474			0.966528			0.96373
	2.92857			0.999177			0.961774			0.95883
	2.97059			0.999974			0.956717			0.95475
	3.01261			0.99884			0.951346			0.95169
	3.05462			0.995609			0.945919			0.94972
	3.09664			0.990356			0.94034			0.94893
	3.13866			0.983423			0.934606			0.94942
	3.18067			0.974436			0.928878			0.95098
	3.22269			0.963608			0.923197			0.9536
	3.26471			0.952011			0.917498			0.95707
	3.30672			0.93836			0.911728			0.96123
	3.34874			0.923818			0.905869			0.96581
	3.39076			0.909042			0.899908			0.97071
	3.43277			0.891934			0.893825			0.97556
	3.47479			0.876378			0.887594			0.98029
	3.51681			0.858088			0.881191			0.98469
	3.55882			0.841755			0.874607			0.98854
	3.60084			0.823443			0.867848			0.99176
	3.64286			0.806875			0.860928			0.99428
	3.68487			0.789086			0.853864			0.99601
	3.72689			0.773369			0.846676			0.99686
	3.76891			0.756012			0.839445			0.99681
	3.81092			0.742765			0.83241			0.99587
	3.85294			0.725229			0.825979			0.9941
	3.89496			0.716692			0.820492			0.99159
	3.93697			0.699217			0.815946			0.98857
	3.97899			0.697379			0.81257			0.98544
	4.02101			0.686591			0.812259			0.98302
	4.06303			0.692243			0.818381			0.98271
	4.10504			0.715812			0.833814			0.98613
	4.14706			0.753469			0.864907			0.98979
	4.18908			0.882101			0.917229			0.97082
	4.23109			0.988252			0.941348			0.92772
	4.27311			0.96616			0.932241			0.93024
	4.31513			0.893118			0.877473			0.93504
	4.35714			0.798042			0.797735			0.94636
	4.39916			0.709593			0.758729			0.96313
	4.44118			0.674743			0.736197			0.97327
	4.48319			0.650318			0.715932			0.97845
	4.52521			0.616852			0.701923			0.98087
	4.56723			0.60492			0.688515			0.98176
	4.60924			0.596369			0.677641			0.98208
	4.65126			0.576688			0.668259			0.98245
	4.69328			0.568459			0.658826			0.98286
	4.73529			0.566199			0.651409			0.98331
	4.77731			0.553822			0.643123			0.98413
	4.81933			0.545051			0.636797			0.98523
	4.86134			0.545493			0.629574			0.9864
	4.90336			0.54026			0.624055			0.98786
	4.94538			0.530989			0.617776			0.98948
	4.98739			0.529764			0.612989			0.99104
	5.02941			0.53084			0.607546			0.99271
	5.07143			0.52522			0.603453			0.99426
	5.11345			0.520052			0.598799			0.99562
	5.15546			0.521836			0.595334			0.9968
	5.19748			0.523282			0.591498			0.99759
	5.2395			0.51926			0.588556			0.99803
	5.28151			0.516444			0.585617			0.99797
	5.32353			0.519403			0.583107			0.99738
	5.36555			0.522399			0.5811			0.99619
	5.40756			0.520788			0.579057			0.99439
	5.44958			0.519041			0.577856			0.99188
	5.4916			0.522141			0.576506			0.98878
	5.53361			0.527208			0.575863			0.98492
	5.57563			0.528998			0.57545			0.98054
	5.61765			0.528479			0.575272			0.97542
	5.65966			0.530714			0.575765			0.96992
	5.70168			0.536799			0.576296			0.96377
	5.7437			0.542659			0.577434			0.95744
	5.78571			0.545433			0.578953			0.95062
	5.82773			0.547378			0.580702			0.94378
	5.86975			0.552291			0.583126			0.93672
	5.91176			0.560309			0.585801			0.92975
	5.95378			0.56811			0.58893			0.92293
	5.9958			0.573489			0.592691			0.91617
	6.03782			0.577991			0.596717			0.90999
	6.07983			0.584693			0.601352			0.90387
	6.12185			0.594454			0.60661			0.89856
	6.16387			0.605178			0.612187			0.89352
	6.20588			0.614476			0.618481			0.88916
	6.2479			0.622321			0.625465			0.88554
	6.28992			0.630845			0.63282			0.88227
	6.33193			0.64193			0.640952			0.88005
	6.37395			0.655354			0.649932			0.87821
	6.41597			0.669255			0.659352			0.87707
	6.45798			0.682112			0.669519			0.87681
	6.5			0.694131			0.680736			0.87674

## Sheet: Figure5_(B)
Wavelength(μm)	1.5		W2=0.42μm	0.55444		W2=0.62μm	0.58392		W2=0.82μm	0.60041		W2=1.02μm	0.50112		W2=1.22μm	0.62712
	1.54202			0.49108			0.51639			0.53126			0.53923			0.55258
	1.58403			0.45667			0.4733			0.48254			0.58145			0.49509
	1.62605			0.44825			0.45798			0.46292			0.62446			0.46901
	1.66807			0.45983			0.46681			0.47008			0.66693			0.47602
	1.71008			0.48245			0.49045			0.49477			0.71017			0.5057
	1.7521			0.51045			0.52207			0.52848			0.75891			0.54681
	1.79412			0.54031			0.55688			0.56645			0.89456			0.59168
	1.83613			0.57112			0.5931			0.60614			0.93185			0.63639
	1.87815			0.60296			0.63013			0.64613			0.98268			0.68017
	1.92017			0.63711			0.66866			0.68772			0.98689			0.72353
	1.96218			0.6785			0.71422			0.73551			0.98289			0.77225
	2.0042			0.8158			0.85246			0.8714			0.97724			0.90509
	2.04622			0.86707			0.89748			0.94244			0.97461			0.94139
	2.08824			0.94896			0.96799			0.9694			0.97482			0.98422
	2.13025			0.95897			0.97622			0.98845			0.97736			0.9862
	2.17227			0.95814			0.97409			0.98235			0.98091			0.98043
	2.21429			0.95563			0.97007			0.97612			0.98469			0.97477
	2.2563			0.95586			0.96858			0.97378			0.98799			0.97178
	2.29832			0.95931			0.97022			0.9747			0.99025			0.9719
	2.34034			0.96538			0.97446			0.97785			0.99111			0.97426
	2.38235			0.97248			0.97983			0.98213			0.99041			0.97765
	2.42437			0.97973			0.98542			0.98665			0.98817			0.98122
	2.46639			0.98649			0.99056			0.99071			0.98458			0.98427
	2.5084			0.99214			0.99459			0.9936			0.97993			0.98627
	2.55042			0.99635			0.99716			0.99508			0.97457			0.98685
	2.59244			0.99894			0.99811			0.99494			0.96894			0.98585
	2.63445			0.99983			0.9974			0.99322			0.96344			0.9833
	2.67647			0.99908			0.99516			0.99003			0.95834			0.97944
	2.71849			0.99686			0.99159			0.98567			0.95407			0.97456
	2.7605			0.99339			0.987			0.98051			0.95075			0.96902
	2.80252			0.98897			0.98175			0.9749			0.94869			0.96336
	2.84454			0.9839			0.97619			0.9692			0.94791			0.95784
	2.88655			0.9784			0.97054			0.96375			0.94845			0.95301
	2.92857			0.97276			0.9652			0.95885			0.95034			0.94898
	2.97059			0.96715			0.96031			0.95476			0.95337			0.94624
	3.01261			0.9618			0.95617			0.9517			0.95737			0.94477
	3.05462			0.95679			0.95283			0.94973			0.96215			0.94471
	3.09664			0.95235			0.95054			0.94894			0.96747			0.94617
	3.13866			0.9484			0.94916			0.94943			0.97304			0.94899
	3.18067			0.94506			0.94882			0.95099			0.9786			0.95294
	3.22269			0.94235			0.94948			0.95361			0.98389			0.95783
	3.26471			0.94009			0.9509			0.95707			0.9887			0.96343
	3.30672			0.93821			0.95297			0.96123			0.99282			0.96946
	3.34874			0.93664			0.9556			0.96581			0.99609			0.9756
	3.39076			0.93527			0.95859			0.97071			0.99835			0.98155
	3.43277			0.93392			0.96172			0.97556			0.99951			0.98701
	3.47479			0.93242			0.96477			0.98029			0.99946			0.99174
	3.51681			0.93064			0.96755			0.98469			0.99815			0.99553
	3.55882			0.92846			0.96991			0.98854			0.9955			0.99818
	3.60084			0.92577			0.97171			0.99176			0.99148			0.99954
	3.64286			0.92249			0.97281			0.99428			0.9861			0.99947
	3.68487			0.91855			0.97314			0.99601			0.97947			0.99786
	3.72689			0.91388			0.9726			0.99686			0.97192			0.99458
	3.76891			0.90844			0.97116			0.99681			0.96409			0.98953
	3.81092			0.90219			0.96876			0.99587			0.95722			0.98267
	3.85294			0.89511			0.96535			0.9941			0.95435			0.974
	3.89496			0.88728			0.96089			0.99159			0.96262			0.96345
	3.93697			0.87894			0.95542			0.98857			0.98803			0.95093
	3.97899			0.8706			0.94916			0.98544			0.9898			0.93703
	4.02101			0.86292			0.9426			0.98302			0.92395			0.9235
	4.06303			0.85681			0.93633			0.98271			0.92647			0.91323
	4.10504			0.8549			0.93139			0.98613			0.94069			0.91377
	4.14706			0.86536			0.93097			0.9898			0.95418			0.944
	4.18908			0.89876			0.93669			0.97082			0.96488			0.97858
	4.23109			0.93046			0.93214			0.92891			0.9668			0.91471
	4.27311			0.9429			0.93731			0.93642			0.96254			0.9215
	4.31513			0.92718			0.93228			0.93693			0.95664			0.94403
	4.35714			0.91637			0.93607			0.94662			0.94852			0.96079
	4.39916			0.92534			0.95727			0.96317			0.94096			0.96833
	4.44118			0.92829			0.97628			0.97329			0.93322			0.96405
	4.48319			0.92017			0.98706			0.97845			0.92589			0.9544
	4.52521			0.90596			0.99189			0.98087			0.91967			0.94256
	4.56723			0.89061			0.99271			0.98176			0.91331			0.92856
	4.60924			0.87374			0.99045			0.98208			0.90867			0.91575
	4.65126			0.85749			0.98619			0.98245			0.90362			0.90166
	4.69328			0.8426			0.98081			0.98286			0.90042			0.88974
	4.73529			0.82739			0.97398			0.98331			0.89678			0.87702
	4.77731			0.81428			0.96668			0.98413			0.89494			0.8664
	4.81933			0.80095			0.95854			0.98523			0.89267			0.85534
	4.86134			0.78896			0.94983			0.9864			0.89216			0.84609
	4.90336			0.77755			0.94092			0.98786			0.89118			0.83655
	4.94538			0.76651			0.93123			0.98948			0.89197			0.8287
	4.98739			0.7567			0.9218			0.99104			0.89223			0.82045
	5.02941			0.74667			0.91152			0.99271			0.8942			0.81401
	5.07143			0.73818			0.90178			0.99426			0.89575			0.80687
	5.11345			0.7292			0.89123			0.99562			0.89867			0.80178
	5.15546			0.72186			0.88143			0.9968			0.90165			0.79573
	5.19748			0.71396			0.87091			0.99759			0.90522			0.79173
	5.2395			0.70764			0.86129			0.99803			0.90965			0.78697
	5.28151			0.70088			0.85107			0.99797			0.91376			0.78366
	5.32353			0.69546			0.84181			0.99738			0.91928			0.78052
	5.36555			0.68995			0.83221			0.99619			0.92422			0.77754
	5.40756			0.68526			0.8234			0.99439			0.93007			0.77606
	5.44958			0.68114			0.81478			0.99188			0.93612			0.77367
	5.4916			0.67705			0.80645			0.98878			0.94182			0.77314
	5.53361			0.67436			0.79906			0.98492			0.94843			0.77225
	5.57563			0.67099			0.79137			0.98054			0.9543			0.77177
	5.61765			0.66944			0.78518			0.97542			0.96032			0.77273
	5.65966			0.66729			0.7786			0.96992			0.9664			0.77277
	5.70168			0.66629			0.77322			0.96377			0.97149			0.77433
	5.7437			0.66591			0.76836			0.95744			0.97661			0.77627
	5.78571			0.66525			0.76356			0.95062			0.981			0.77772
	5.82773			0.66638			0.76038			0.94378			0.98431			0.78095
	5.86975			0.66691			0.75685			0.93672			0.98719			0.78392
	5.91176			0.66849			0.75447			0.92975			0.98882			0.78684
	5.95378			0.67108			0.75305			0.92293			0.98927			0.79144
	5.9958			0.67311			0.75138			0.91617			0.9889			0.79553
	6.03782			0.67687			0.75139			0.90999			0.98702			0.79969
	6.07983			0.68084			0.75173			0.90387			0.98402			0.80536
	6.12185			0.68477			0.75222			0.89856			0.98018			0.81049
	6.16387			0.69051			0.75447			0.89352			0.97486			0.81538
	6.20588			0.69612			0.75674			0.88916			0.96866			0.82154
	6.2479			0.70204			0.75943			0.88554			0.96212			0.82721
	6.28992			0.70971			0.76383			0.88227			0.95446			0.83196
	6.33193			0.71722			0.76822			0.88005						0.83742
	6.37395			0.72507			0.773			0.87822						0.84245
	6.41597			0.73466			0.77945			0.87707						0.8457
	6.45798			0.74424			0.78601			0.87681						0.84848
	6.5			0.7539			0.79267			0.87674						0.8508

## Sheet: Figure5_(C)
Wavelength(μm)	1.5		L2=0.2μm	0.53771		L2=0.4μm	0.5622		L2=0.6μm	0.58121		L2=0.8μm	0.59367		L2=1.0μm	0.60041
	1.54202			0.49902			0.51534			0.52575			0.53043			0.53126
	1.58403			0.47293			0.48202			0.48621			0.48598			0.48254
	1.62605			0.46875			0.47295			0.4726			0.46893			0.46292
	1.66807			0.4834			0.48537			0.48314			0.47788			0.47008
	1.71008			0.51037			0.51213			0.50943			0.50406			0.49477
	1.7521			0.54371			0.54641			0.54435			0.53933			0.52848
	1.79412			0.57983			0.58404			0.58295			0.57846			0.56645
	1.83613			0.61672			0.62268			0.62291			0.61877			0.60614
	1.87815			0.65461			0.66229			0.66318			0.6593			0.64613
	1.92017			0.69313			0.70245			0.70469			0.70141			0.68772
	1.96218			0.73872			0.74961			0.75299			0.75021			0.73551
	2.0042			0.87372			0.88804			0.89528			0.89289			0.8714
	2.04622			0.90733			0.92154			0.92829			0.92733			0.94244
	2.08824			0.9638			0.97312			0.97828			0.97988			0.9694
	2.13025			0.97647			0.98471			0.98807			0.98751			0.98845
	2.17227			0.97761			0.98525			0.9874			0.98587			0.98235
	2.21429			0.97596			0.98308			0.98431			0.98162			0.97612
	2.2563			0.97507			0.98172			0.98259			0.97965			0.97378
	2.29832			0.97655			0.98264			0.98334			0.98022			0.9747
	2.34034			0.97968			0.98519			0.98568			0.98296			0.97785
	2.38235			0.9837			0.98861			0.98904			0.98657			0.98213
	2.42437			0.98797			0.99225			0.99264			0.99044			0.98665
	2.46639			0.99197			0.99555			0.99584			0.9939			0.99071
	2.5084			0.99527			0.99809			0.99816			0.9964			0.9936
	2.55042			0.99764			0.99961			0.99934			0.99761			0.99508
	2.59244			0.9989			0.99995			0.99925			0.99738			0.99494
	2.63445			0.99904			0.99912			0.99787			0.99572			0.99322
	2.67647			0.99811			0.9972			0.99532			0.99279			0.99003
	2.71849			0.99629			0.99442			0.99187			0.98884			0.98567
	2.7605			0.99373			0.99097			0.98773			0.98423			0.98051
	2.80252			0.99064			0.9871			0.98323			0.97914			0.9749
	2.84454			0.98723			0.98308			0.97866			0.97403			0.9692
	2.88655			0.98362			0.97902			0.97418			0.9692			0.96375
	2.92857			0.98			0.9752			0.9701			0.96473			0.95885
	2.97059			0.97644			0.97167			0.96653			0.96108			0.95476
	3.01261			0.97304			0.96857			0.9636			0.9582			0.9517
	3.05462			0.96995			0.96608			0.96152			0.95626			0.94973
	3.09664			0.96712			0.96411			0.96021			0.95555			0.94894
	3.13866			0.96459			0.96271			0.95971			0.95566			0.94943
	3.18067			0.96243			0.96196			0.96006			0.95678			0.95099
	3.22269			0.96064			0.96179			0.96119			0.95896			0.95361
	3.26471			0.95914			0.96212			0.96294			0.96188			0.95707
	3.30672			0.95789			0.96285			0.96522			0.9653			0.96123
	3.34874			0.95684			0.96392			0.96792			0.96912			0.96581
	3.39076			0.95597			0.96526			0.97092			0.97325			0.97071
	3.43277			0.95525			0.96681			0.9741			0.97752			0.97556
	3.47479			0.95466			0.9685			0.97734			0.98173			0.98029
	3.51681			0.95416			0.97028			0.98055			0.98572			0.98469
	3.55882			0.95374			0.97208			0.98362			0.98936			0.98854
	3.60084			0.95339			0.97388			0.98649			0.99255			0.99176
	3.64286			0.95311			0.97564			0.9891			0.99521			0.99428
	3.68487			0.9529			0.97736			0.99142			0.99729			0.99601
	3.72689			0.95278			0.97904			0.99343			0.99876			0.99686
	3.76891			0.95286			0.98075			0.99515			0.99962			0.99681
	3.81092			0.95335			0.98261			0.99662			0.99987			0.99587
	3.85294			0.95449			0.98473			0.99785			0.99952			0.9941
	3.89496			0.95633			0.98709			0.99886			0.99865			0.99159
	3.93697			0.9586			0.98945			0.9996			0.99736			0.98857
	3.97899			0.96079			0.99142			0.99994			0.99571			0.98544
	4.02101			0.96168			0.99196			0.99939			0.99388			0.98302
	4.06303			0.95745			0.98834			0.99675			0.99245			0.98271
	4.10504			0.94107			0.97544			0.98947			0.99111			0.98613
	4.14706			0.91317			0.94956			0.97225			0.98463			0.9898
	4.18908			0.90558			0.92889			0.94767			0.96285			0.97082
	4.23109			0.9265			0.92789			0.92901			0.92951			0.92891
	4.27311			0.94681			0.9431			0.93921			0.93554			0.93642
	4.31513			0.92927			0.93196			0.93421			0.93571			0.93693
	4.35714			0.89551			0.91042			0.92383			0.93594			0.94662
	4.39916			0.88259			0.90721			0.92863			0.9469			0.96317
	4.44118			0.87813			0.90925			0.93532			0.95617			0.97329
	4.48319			0.87504			0.91139			0.9399			0.96152			0.97845
	4.52521			0.87431			0.91476			0.94488			0.96557			0.98087
	4.56723			0.87195			0.91652			0.94751			0.96787			0.98176
	4.60924			0.87158			0.91971			0.95126			0.97004			0.98208
	4.65126			0.87125			0.92254			0.95419			0.97201			0.98245
	4.69328			0.87195			0.92616			0.95767			0.97392			0.98286
	4.73529			0.87367			0.93011			0.96128			0.97617			0.98331
	4.77731			0.87552			0.93416			0.96477			0.97834			0.98413
	4.81933			0.87858			0.93871			0.96878			0.98088			0.98523
	4.86134			0.8813			0.94295			0.97229			0.98333			0.9864
	4.90336			0.88499			0.94752			0.97628			0.98601			0.98786
	4.94538			0.88805			0.95151			0.97958			0.98856			0.98948
	4.98739			0.8917			0.95553			0.98313			0.99113			0.99104
	5.02941			0.89449			0.95874			0.98585			0.99348			0.99271
	5.07143			0.89741			0.96163			0.98852			0.99562			0.99426
	5.11345			0.89925			0.96351			0.99023			0.9974			0.99562
	5.15546			0.90075			0.96472			0.9916			0.99877			0.9968
	5.19748			0.90106			0.96478			0.99188			0.99962			0.99759
	5.2395			0.90055			0.96386			0.99156			0.99988			0.99803
	5.28151			0.89889			0.96175			0.99008			0.99944			0.99797
	5.32353			0.896			0.95843			0.98778			0.99833			0.99738
	5.36555			0.89218			0.95405			0.98441			0.99631			0.99619
	5.40756			0.88688			0.94833			0.97989			0.99364			0.99439
	5.44958			0.88095			0.94178			0.9748			0.98994			0.99188
	5.4916			0.87369			0.93402			0.96811			0.98558			0.98878
	5.53361			0.8659			0.9256			0.96134			0.98036			0.98492
	5.57563			0.85741			0.91641			0.95319			0.97431			0.98054
	5.61765			0.84832			0.90664			0.94457			0.96781			0.97542
	5.65966			0.8393			0.8967			0.93594			0.96039			0.96992
	5.70168			0.82983			0.88633			0.92593			0.95273			0.96377
	5.7437			0.82072			0.87616			0.91674			0.94466			0.95744
	5.78571			0.81191			0.8661			0.9071			0.93605			0.95062
	5.82773			0.80324			0.8562			0.89691			0.92775			0.94378
	5.86975			0.79552			0.84702			0.88824			0.91908			0.93672
	5.91176			0.78823			0.83819			0.87891			0.91049			0.92975
	5.95378			0.78161			0.83003			0.86987			0.90256			0.92293
	5.9958			0.77621			0.82288			0.86269			0.89443			0.91617
	6.03782			0.77135			0.81625			0.85491			0.8869			0.90999
	6.07983			0.76746			0.81061			0.84782			0.88029			0.90387
	6.12185			0.7649			0.80614			0.8429			0.87366			0.89856
	6.16387			0.76296			0.80228			0.83757			0.86793			0.89352
	6.20588			0.76203			0.79951			0.83283			0.86339			0.88916
	6.2479			0.76252			0.79805			0.83056			0.85895			0.88554
	6.28992			0.76368			0.79722			0.82833			0.85545			0.88227
	6.33193			0.76571			0.79737			0.82611			0.85339			0.88005
	6.37395			0.7692			0.79893			0.82636			0.85156			0.87822
	6.41597			0.77349			0.80121			0.82753			0.85038			0.87707
	6.45798			0.77833			0.80413			0.82809			0.85079			0.87681
	6.5			0.78448			0.80839			0.83029			0.85174			0.87674

## Sheet: Figure5_(D)
Wavelength(μm)	1.5		H1=15nm	0.60041		H1=25nm	0.65567		H1=35nm	0.69789		H1=45nm	0.73031		H1=55nm	0.75433
	1.54202			0.53126			0.57786			0.62081			0.66071			0.69637
	1.58403			0.48254			0.5134			0.54593			0.58091			0.61718
	1.62605			0.46292			0.4786			0.49765			0.5219			0.55059
	1.66807			0.47008			0.47546			0.48399			0.49778			0.51661
	1.71008			0.49477			0.49488			0.49599			0.50133			0.51213
	1.7521			0.52848			0.52592			0.52184			0.52189			0.52623
	1.79412			0.56645			0.56256			0.55506			0.55049			0.55033
	1.83613			0.60614			0.60111			0.59093			0.58294			0.57909
	1.87815			0.64613			0.64036			0.62773			0.61731			0.61037
	1.92017			0.68772			0.68083			0.66615			0.65373			0.64432
	1.96218			0.73551			0.72865			0.71393			0.7002			0.68976
	2.0042			0.8714			0.87633			0.87056			0.86317			0.85683
	2.04622			0.94244			0.91778			0.91224			0.90406			0.8956
	2.08824			0.9694			0.98204			0.98265			0.98052			0.9777
	2.13025			0.98845			0.98507			0.98357			0.98058			0.97798
	2.17227			0.98235			0.97817			0.97289			0.96728			0.96243
	2.21429			0.97612			0.96965			0.96042			0.95197			0.94407
	2.2563			0.97378			0.96402			0.95217			0.94076			0.93054
	2.29832			0.9747			0.96276			0.94872			0.9351			0.92283
	2.34034			0.97785			0.96442			0.94907			0.9344			0.92095
	2.38235			0.98213			0.96823			0.95227			0.93687			0.92258
	2.42437			0.98665			0.97274			0.95679			0.94117			0.92693
	2.46639			0.99071			0.9771			0.96153			0.94632			0.93223
	2.5084			0.9936			0.98062			0.96574			0.9511			0.93732
	2.55042			0.99508			0.98273			0.96865			0.95466			0.94139
	2.59244			0.99494			0.98312			0.96977			0.95643			0.94372
	2.63445			0.99322			0.98169			0.96889			0.95609			0.94386
	2.67647			0.99003			0.97854			0.96604			0.95357			0.94168
	2.71849			0.98567			0.97393			0.96139			0.949			0.93728
	2.7605			0.98051			0.9682			0.9553			0.94275			0.93093
	2.80252			0.9749			0.96171			0.94826			0.9353			0.92294
	2.84454			0.9692			0.95497			0.94073			0.92695			0.91391
	2.88655			0.96375			0.94842			0.93295			0.91822			0.9045
	2.92857			0.95885			0.94233			0.92568			0.90983			0.89478
	2.97059			0.95476			0.93723			0.9192			0.90178			0.88558
	3.01261			0.9517			0.93318			0.9137			0.89491			0.87696
	3.05462			0.94973			0.93058			0.90964			0.88889			0.86936
	3.09664			0.94894			0.92932			0.90686			0.88432			0.86256
	3.13866			0.94943			0.92948			0.90538			0.88073			0.85694
	3.18067			0.95099			0.93099			0.90526			0.87802			0.85172
	3.22269			0.95361			0.93352			0.90578			0.87613			0.847
	3.26471			0.95707			0.93686			0.90695			0.87438			0.84251
	3.30672			0.96123			0.94078			0.90844			0.87238			0.83759
	3.34874			0.96581			0.94492			0.90959			0.86996			0.83205
	3.39076			0.97071			0.94891			0.91006			0.86689			0.82596
	3.43277			0.97556			0.95243			0.90971			0.86292			0.8193
	3.47479			0.98029			0.95523			0.90837			0.85794			0.81204
	3.51681			0.98469			0.95709			0.90589			0.852			0.80428
	3.55882			0.98854			0.95783			0.90223			0.84529			0.79622
	3.60084			0.99176			0.95736			0.89744			0.83803			0.78814
	3.64286			0.99428			0.95562			0.8917			0.83049			0.78029
	3.68487			0.99601			0.95266			0.88524			0.82296			0.77295
	3.72689			0.99686			0.94857			0.87833			0.81573			0.76637
	3.76891			0.99681			0.94353			0.87127			0.8091			0.76079
	3.81092			0.99587			0.9378			0.86441			0.80339			0.75648
	3.85294			0.9941			0.93167			0.85814			0.79895			0.75378
	3.89496			0.99159			0.92555			0.85302			0.79628			0.75318
	3.93697			0.98857			0.91999			0.84991			0.79621			0.75558
	3.97899			0.98544			0.91602			0.85025			0.80028			0.76262
	4.02101			0.98302			0.91564			0.8563			0.81114			0.77704
	4.06303			0.98271			0.92234			0.87167			0.83301			0.80325
	4.10504			0.98613			0.94058			0.90216			0.87257			0.84876
	4.14706			0.9898			0.97125			0.95262			0.93663			0.92274
	4.18908			0.97082			0.98493			0.98964			0.9917			0.9924
	4.23109			0.92891			0.93369			0.93666			0.93925			0.94156
	4.27311			0.93642			0.92185			0.91321			0.90546			0.89864
	4.31513			0.93693			0.93498			0.92893			0.92066			0.91085
	4.35714			0.94662			0.96638			0.96767			0.95503			0.93389
	4.39916			0.96317			0.9919			0.98408			0.95117			0.90895
	4.44118			0.97329			0.99959			0.97299			0.92057			0.86636
	4.48319			0.97845			0.9971			0.95353			0.8907			0.83324
	4.52521			0.98087			0.99032			0.93436			0.86642			0.80936
	4.56723			0.98176			0.98249			0.918			0.84905			0.79383
	4.60924			0.98208			0.97536			0.90564			0.83725			0.78408
	4.65126			0.98245			0.96841			0.89553			0.82772			0.77679
	4.69328			0.98286			0.96298			0.88757			0.82186			0.77292
	4.73529			0.98331			0.95795			0.88177			0.81725			0.77023
	4.77731			0.98413			0.95381			0.87657			0.81387			0.76872
	4.81933			0.98523			0.95034			0.87293			0.8121			0.7685
	4.86134			0.9864			0.94704			0.86969			0.81007			0.76826
	4.90336			0.98786			0.94451			0.86701			0.80965			0.76916
	4.94538			0.98948			0.94167			0.86496			0.80851			0.76968
	4.98739			0.99104			0.93954			0.86273			0.8086			0.77101
	5.02941			0.99271			0.93685			0.86123			0.80798			0.77193
	5.07143			0.99426			0.93472			0.85918			0.80821			0.77337
	5.11345			0.99562			0.93191			0.85784			0.80777			0.7744
	5.15546			0.9968			0.9295			0.85577			0.80798			0.7758
	5.19748			0.99759			0.92639			0.85437			0.80748			0.77676
	5.2395			0.99803			0.92349			0.85215			0.80764			0.77805
	5.28151			0.99797			0.92005			0.85059			0.80693			0.77884
	5.32353			0.99738			0.9165			0.84818			0.80702			0.77998
	5.36555			0.99619			0.91278			0.84641			0.80609			0.78061
	5.40756			0.99439			0.90853			0.84385			0.80604			0.78156
	5.44958			0.99188			0.90457			0.84184			0.80505			0.78213
	5.4916			0.98878			0.89981			0.83932			0.80473			0.78282
	5.53361			0.98492			0.8955			0.83698			0.80398			0.78348
	5.57563			0.98054			0.89068			0.83475			0.80322			0.78394
	5.61765			0.97542			0.88586			0.83209			0.80294			0.78474
	5.65966			0.96992			0.88135			0.83025			0.8019			0.78517
	5.70168			0.96377			0.87627			0.82761			0.80188			0.786
	5.7437			0.95744			0.87192			0.82589			0.80122			0.78676
	5.78571			0.95062			0.86735			0.82391			0.80095			0.78751
	5.82773			0.94378			0.86283			0.822			0.80122			0.78875
	5.86975			0.93672			0.85914			0.821			0.80084			0.78972
	5.91176			0.92975			0.85505			0.81931			0.80157			0.79114
	5.95378			0.92293			0.85161			0.81869			0.80212			0.79284
	5.9958			0.91617			0.84885			0.81824			0.80264			0.7944
	6.03782			0.90999			0.84578			0.81755			0.80431			0.79666
	6.07983			0.90387			0.84369			0.81822			0.8055			0.79901
	6.12185			0.89856			0.84222			0.81858			0.80715			0.80143
	6.16387			0.89352			0.84054			0.81924			0.80982			0.80463
	6.20588			0.88916			0.83998			0.8212			0.81199			0.80784
	6.2479			0.88554			0.84009			0.8227			0.81481			0.81124
	6.28992			0.88227			0.84001			0.82477			0.8186			0.81544
	6.33193			0.88005			0.841			0.82807			0.82192			0.81966
	6.37395			0.87822			0.84284			0.83089			0.82582			0.82403
	6.41597			0.87707			0.84447			0.83424			0.83075			0.82921
	6.45798			0.87681			0.84684			0.83883			0.83529			0.83445
	6.5			0.87674			0.85031			0.84299			0.84003			0.83964
