# Supplementary material for: Ultra-broadband infrared metamaterial absorber based on MDMDM structure for optical sensing
Source: Frontiers journal article supplement (doi:10.3389/fspas.2023.1338284), 2024-01-05
Supplement: Data_Sheet_5.XLSX [file Data_Sheet_5.XLSX]

## Sheet: Figure6_(A)
Wavelength(μm)	1.5		H2=0.2μm	0.756562	0.870575	H2=0.4μm	0.614305		H2=0.6μm	0.600407		H2=0.8μm	0.915635		H2=1.0μm	0.623506
	1.54202			0.741105			0.647138			0.531255			0.924676			0.727281
	1.58403			0.733412			0.675897			0.482537			0.926982			0.826803
	1.62605			0.731893			0.706037			0.462917			0.916962			0.887727
	1.66807			0.735021			0.736494			0.470076			0.886591			0.926333
	1.71008			0.741361			0.766469			0.494765			0.846996			0.952318
	1.7521			0.749711			0.79417			0.528476			0.802286			0.966358
	1.79412			0.758965			0.820571			0.566447			0.755917			0.971922
	1.83613			0.768167			0.844774			0.606141			0.712387			0.970313
	1.87815			0.777706			0.86741			0.64613			0.676705			0.962336
	1.92017			0.78704			0.88915			0.687722			0.653986			0.949544
	1.96218			0.797797			0.912201			0.735507			0.651567			0.936714
	2.0042			0.823811			0.983172			0.871403			0.737908			0.96751
	2.04622			0.835389			0.975489			0.942443			0.715601			0.939535
	2.08824			0.83811			0.98023			0.9694			0.752688			0.87615
	2.13025			0.837698			0.982563			0.988454			0.819874			0.834308
	2.17227			0.836513			0.984185			0.982347			0.871782			0.809411
	2.21429			0.834942			0.984681			0.976122			0.888455			0.818126
	2.2563			0.833518			0.984019			0.973776			0.885295			0.830734
	2.29832			0.832824			0.982199			0.974702			0.88081			0.829097
	2.34034			0.833401			0.979294			0.977853			0.881319			0.823296
	2.38235			0.835703			0.975481			0.982131			0.887156			0.820981
	2.42437			0.840059			0.971046			0.986653			0.896997			0.823684
	2.46639			0.846642			0.966305			0.990711			0.909201			0.831542
	2.5084			0.855436			0.961531			0.993601			0.922288			0.842875
	2.55042			0.866208			0.95722			0.995083			0.935375			0.856668
	2.59244			0.878472			0.953703			0.994943			0.947572			0.872253
	2.63445			0.891441			0.951133			0.993224			0.957791			0.888101
	2.67647			0.904208			0.949767			0.990026			0.965901			0.903781
	2.71849			0.916329			0.949508			0.985671			0.971106			0.9188
	2.7605			0.928068			0.950307			0.980509			0.973456			0.932088
	2.80252			0.939408			0.9522			0.9749			0.972572			0.942491
	2.84454			0.949644			0.95495			0.969203			0.968915			0.949122
	2.88655			0.958885			0.958508			0.963751			0.962656			0.951481
	2.92857			0.967429			0.962827			0.958847			0.954291			0.949462
	2.97059			0.974239			0.967706			0.954764			0.944589			0.943299
	3.01261			0.979305			0.972893			0.951702			0.934107			0.933478
	3.05462			0.982789			0.978144			0.949734			0.923346			0.920662
	3.09664			0.983687			0.983215			0.948938			0.912866			0.905612
	3.13866			0.982627			0.987857			0.949428			0.903199			0.889108
	3.18067			0.97932			0.991837			0.950985			0.894766			0.871851
	3.22269			0.973543			0.994954			0.953606			0.887877			0.854393
	3.26471			0.966438			0.997061			0.957073			0.88274			0.837202
	3.30672			0.956726			0.998066			0.961231			0.879487			0.820916
	3.34874			0.946792			0.997938			0.965813			0.878179			0.806426
	3.39076			0.934376			0.996702			0.970713			0.878818			0.794207
	3.43277			0.922873			0.994439			0.975563			0.88134			0.783715
	3.47479			0.909178			0.991273			0.98029			0.885599			0.774852
	3.51681			0.897037			0.987334			0.984694			0.891337			0.769342
	3.55882			0.883781			0.982736			0.988543			0.898194			0.767427
	3.60084			0.871006			0.977612			0.991762			0.905773			0.766759
	3.64286			0.860145			0.972225			0.994284			0.91376			0.768953
	3.68487			0.846468			0.966907			0.996007			0.921875			0.775349
	3.72689			0.838425			0.961747			0.996856			0.929594			0.781317
	3.76891			0.826488			0.956695			0.996807			0.935993			0.78951
	3.81092			0.817724			0.952366			0.995873			0.940242			0.799263
	3.85294			0.81355			0.949634			0.9941			0.942103			0.804566
	3.89496			0.803476			0.948325			0.991594			0.941271			0.81134
	3.93697			0.805317			0.949245			0.988568			0.93646			0.810216
	3.97899			0.810173			0.95465			0.985442			0.927026			0.805408
	4.02101			0.812157			0.964159			0.983016			0.915307			0.795673
	4.06303			0.838721			0.97759			0.982707			0.903651			0.780958
	4.10504			0.853294			0.987115			0.986132			0.899121			0.78251
	4.14706			0.818272			0.962896			0.989796			0.925164			0.81308
	4.18908			0.81429			0.900723			0.970816			0.980488			0.926599
	4.23109			0.898547			0.900774			0.928913			0.969548			0.996148
	4.27311			0.982044			0.959065			0.936418			0.914517			0.915636
	4.31513			0.977665			0.976442			0.936926			0.886065			0.846481
	4.35714			0.916735			0.961037			0.946618			0.876061			0.790047
	4.39916			0.860051			0.941965			0.963175			0.909046			0.801326
	4.44118			0.820284			0.925459			0.973286			0.937473			0.831082
	4.48319			0.793102			0.915447			0.97845			0.961394			0.85901
	4.52521			0.779946			0.906995			0.980872			0.97683			0.890592
	4.56723			0.773306			0.902354			0.98176			0.987674			0.909481
	4.60924			0.763293			0.898974			0.982078			0.993972			0.928761
	4.65126			0.75396			0.898178			0.982453			0.997273			0.93833
	4.69328			0.75259			0.89888			0.982863			0.998374			0.945296
	4.73529			0.754866			0.900816			0.983308			0.997634			0.948531
	4.77731			0.75384			0.904658			0.984126			0.996132			0.947015
	4.81933			0.752339			0.908497			0.985232			0.993441			0.946146
	4.86134			0.75639			0.914539			0.986399			0.990768			0.940952
	4.90336			0.764335			0.919865			0.987857			0.987397			0.936122
	4.94538			0.770474			0.927038			0.989475			0.984161			0.931327
	4.98739			0.774613			0.933674			0.991037			0.980934			0.923767
	5.02941			0.781395			0.940943			0.992714			0.977351			0.918555
	5.07143			0.792379			0.948452			0.994259			0.974598			0.912848
	5.11345			0.804044			0.955253			0.995621			0.971047			0.905511
	5.15546			0.813471			0.96256			0.996802			0.968404			0.901023
	5.19748			0.822183			0.968786			0.997594			0.965561			0.896208
	5.2395			0.833204			0.974657			0.998032			0.962514			0.88994
	5.28151			0.846609			0.979887			0.997969			0.96042			0.886436
	5.32353			0.859677			0.983769			0.997383			0.957482			0.883447
	5.36555			0.870564			0.986997			0.996189			0.955048			0.878658
	5.40756			0.880215			0.988797			0.99439			0.953027			0.875821
	5.44958			0.890538			0.989284			0.991884			0.950099			0.874827
	5.4916			0.901746			0.988695			0.98878			0.947937			0.872173
	5.53361			0.912136			0.986449			0.984917			0.945816			0.869664
	5.57563			0.9201			0.983064			0.980537			0.94282			0.869788
	5.61765			0.925714			0.978524			0.975415			0.940596			0.869884
	5.65966			0.930245			0.972497			0.96992			0.938371			0.868426
	5.70168			0.934482			0.965718			0.963774			0.935213			0.868251
	5.7437			0.937882			0.958151			0.957437			0.932691			0.870157
	5.78571			0.939263			0.949495			0.950618			0.93045			0.871341
	5.82773			0.93811			0.940591			0.94378			0.927219			0.871291
	5.86975			0.9351			0.931601			0.936724			0.924272			0.87258
	5.91176			0.931446			0.922039			0.929748			0.922081			0.87565
	5.95378			0.927838			0.91259			0.922926			0.919159			0.878109
	5.9958			0.924017			0.903824			0.916175			0.915893			0.879253
	6.03782			0.919258			0.895171			0.909993			0.913634			0.881136
	6.07983			0.913234			0.886725			0.903867			0.911486			0.884772
	6.12185			0.906465			0.879363			0.898562			0.908524			0.888479
	6.16387			0.900025			0.872956			0.893516			0.906013			0.8908
	6.20588			0.894827			0.866928			0.889158			0.904579			0.892749
	6.2479			0.891085			0.861747			0.885544			0.902894			0.896
	6.28992			0.888325			0.858017			0.882269			0.900647			0.900284
	6.33193			0.885878			0.8553			0.880054			0.899233			0.903903
	6.37395			0.883436			0.853144			0.878215			0.898871			0.906206
	6.41597			0.881291			0.852025			0.877074			0.898208			0.90835
	6.45798			0.880142			0.852358			0.876806			0.897047			0.911542
	6.5			0.880647			0.853682			0.876736			0.896687			0.915421

## Sheet: Figure6_(B)
Wavelength(μm)	1.5		H3=15nm	0.56261		H3=25nm	0.581767		H3=35nm	0.600407		H3=45nm	0.620709		H3=55nm	0.640033
	1.54202			0.513589			0.521086			0.531255			0.547169			0.566275
	1.58403			0.487979			0.483085			0.482537			0.49			0.503206
	1.62605			0.491065			0.474684			0.462917			0.459308			0.462809
	1.66807			0.51749			0.492183			0.470076			0.456172			0.449065
	1.71008			0.557115			0.525122			0.494765			0.473493			0.457616
	1.7521			0.602411			0.565427			0.528476			0.502604			0.480246
	1.79412			0.648695			0.607944			0.566447			0.537901			0.511261
	1.83613			0.693622			0.650369			0.606141			0.575998			0.546857
	1.87815			0.736273			0.691832			0.64613			0.615781			0.58559
	1.92017			0.777152			0.732843			0.687722			0.657706			0.627499
	1.96218			0.820873			0.77891			0.735507			0.707037			0.677828
	2.0042			0.939873			0.909111			0.871403			0.848919			0.822796
	2.04622			0.967913			0.944496			0.942443			0.891135			0.865586
	2.08824			0.993701			0.986982			0.9694			0.966605			0.952722
	2.13025			0.995846			0.989562			0.988454			0.979696			0.97502
	2.17227			0.996449			0.988163			0.982347			0.976608			0.973286
	2.21429			0.996824			0.986592			0.976122			0.96864			0.962522
	2.2563			0.99751			0.986648			0.973776			0.963018			0.953595
	2.29832			0.998056			0.988322			0.974702			0.962009			0.950144
	2.34034			0.997948			0.990976			0.977853			0.964138			0.95089
	2.38235			0.996401			0.993554			0.982131			0.968633			0.954937
	2.42437			0.993138			0.995393			0.986653			0.974325			0.961015
	2.46639			0.987846			0.995984			0.990711			0.980162			0.967899
	2.5084			0.980491			0.994945			0.993601			0.985482			0.974794
	2.55042			0.971275			0.992146			0.995083			0.989798			0.981093
	2.59244			0.96051			0.987643			0.994943			0.992779			0.986343
	2.63445			0.948574			0.981631			0.993224			0.994267			0.990251
	2.67647			0.93586			0.974405			0.990026			0.994264			0.992688
	2.71849			0.922703			0.966298			0.985671			0.992926			0.9937
	2.7605			0.909439			0.957683			0.980509			0.990527			0.993488
	2.80252			0.896579			0.949043			0.9749			0.987426			0.992328
	2.84454			0.884414			0.940707			0.969203			0.98395			0.990508
	2.88655			0.872925			0.932816			0.963751			0.980407			0.988391
	2.92857			0.86288			0.925974			0.958847			0.977185			0.986297
	2.97059			0.854112			0.920143			0.954764			0.974403			0.984424
	3.01261			0.847261			0.915812			0.951702			0.972402			0.983041
	3.05462			0.842126			0.912853			0.949734			0.971172			0.982222
	3.09664			0.839367			0.911699			0.948938			0.970852			0.982046
	3.13866			0.83853			0.912013			0.949428			0.971476			0.982577
	3.18067			0.839968			0.913948			0.950985			0.972867			0.983677
	3.22269			0.843686			0.917437			0.953606			0.974982			0.985269
	3.26471			0.849223			0.922087			0.957073			0.977721			0.987268
	3.30672			0.856453			0.927721			0.961231			0.980865			0.989495
	3.34874			0.865271			0.934188			0.965813			0.984192			0.991757
	3.39076			0.875336			0.941204			0.970713			0.987522			0.993895
	3.43277			0.886212			0.948445			0.975563			0.990693			0.995782
	3.47479			0.897496			0.955629			0.98029			0.993555			0.997313
	3.51681			0.908828			0.962523			0.984694			0.99598			0.998414
	3.55882			0.919863			0.968917			0.988543			0.997871			0.99904
	3.60084			0.930264			0.974619			0.991762			0.999168			0.999185
	3.64286			0.939699			0.979445			0.994284			0.999843			0.998873
	3.68487			0.947846			0.983227			0.996007			0.999901			0.998157
	3.72689			0.95438			0.985805			0.996856			0.999373			0.997123
	3.76891			0.958971			0.987037			0.996807			0.998324			0.995887
	3.81092			0.961276			0.986799			0.995873			0.996854			0.994606
	3.85294			0.960946			0.984998			0.9941			0.995118			0.993484
	3.89496			0.957667			0.981596			0.991594			0.993317			0.992759
	3.93697			0.951285			0.97668			0.988568			0.991674			0.992635
	3.97899			0.942184			0.97071			0.985442			0.99041			0.993202
	4.02101			0.932211			0.965127			0.983016			0.98984			0.994309
	4.06303			0.92657			0.963368			0.982707			0.990165			0.994808
	4.10504			0.936737			0.97164			0.986132			0.989388			0.9897
	4.14706			0.974292			0.993012			0.989796			0.979496			0.967788
	4.18908			0.971982			0.987248			0.970816			0.952705			0.929863
	4.23109			0.864181			0.91321			0.928913			0.929621			0.920037
	4.27311			0.861384			0.903906			0.936418			0.949161			0.958956
	4.31513			0.850792			0.901334			0.936926			0.961422			0.977976
	4.35714			0.854514			0.912513			0.946618			0.965318			0.974665
	4.39916			0.89656			0.942188			0.963175			0.968072			0.965693
	4.44118			0.935509			0.965113			0.973286			0.967954			0.957324
	4.48319			0.961528			0.978243			0.97845			0.965869			0.950999
	4.52521			0.978113			0.985826			0.980872			0.964559			0.947433
	4.56723			0.988909			0.990302			0.98176			0.962685			0.944421
	4.60924			0.995214			0.992461			0.982078			0.962061			0.94377
	4.65126			0.998577			0.993567			0.982453			0.962091			0.944075
	4.69328			0.999934			0.993815			0.982863			0.962488			0.945238
	4.73529			0.999733			0.993668			0.983308			0.964137			0.947878
	4.77731			0.998507			0.993297			0.984126			0.965679			0.950501
	4.81933			0.996591			0.992798			0.985232			0.968349			0.954461
	4.86134			0.994061			0.992311			0.986399			0.970915			0.958254
	4.90336			0.991248			0.991788			0.987857			0.974175			0.962868
	4.94538			0.988072			0.991334			0.989475			0.977415			0.967369
	4.98739			0.984729			0.99084			0.991037			0.980927			0.97216
	5.02941			0.981187			0.99039			0.992714			0.984385			0.976799
	5.07143			0.977471			0.989841			0.994259			0.987788			0.981295
	5.11345			0.973636			0.989264			0.995621			0.990981			0.985459
	5.15546			0.969597			0.988513			0.996802			0.993854			0.989127
	5.19748			0.965445			0.987628			0.997594			0.9963			0.992199
	5.2395			0.961082			0.986509			0.998032			0.998181			0.994458
	5.28151			0.956542			0.985114			0.997969			0.999429			0.995848
	5.32353			0.951845			0.983478			0.997383			0.999867			0.996147
	5.36555			0.946831			0.981385			0.996189			0.999524			0.995333
	5.40756			0.941795			0.979111			0.99439			0.998172			0.993262
	5.44958			0.936253			0.9762			0.991884			0.995908			0.989834
	5.4916			0.930852			0.973174			0.98878			0.99263			0.985231
	5.53361			0.924835			0.969468			0.984917			0.988216			0.978993
	5.57563			0.918975			0.965561			0.980537			0.983075			0.97191
	5.61765			0.912685			0.961232			0.975415			0.976567			0.963096
	5.65966			0.906241			0.956392			0.96992			0.969623			0.953613
	5.70168			0.899891			0.951585			0.963774			0.961565			0.94299
	5.7437			0.892964			0.946074			0.957437			0.95283			0.931321
	5.78571			0.886481			0.940709			0.950618			0.943924			0.919644
	5.82773			0.879589			0.935101			0.94378			0.933947			0.906763
	5.86975			0.872705			0.929156			0.936724			0.924279			0.89411
	5.91176			0.866268			0.923717			0.929748			0.914346			0.881522
	5.95378			0.859311			0.917855			0.922926			0.903957			0.868298
	5.9958			0.852973			0.912284			0.916175			0.894525			0.856237
	6.03782			0.846848			0.907274			0.909993			0.884813			0.844222
	6.07983			0.840451			0.901947			0.903867			0.875312			0.832249
	6.12185			0.835044			0.897419			0.898562			0.867121			0.821932
	6.16387			0.829721			0.893471			0.893516			0.858755			0.811723
	6.20588			0.824426			0.889413			0.889158			0.85098			0.801926
	6.2479			0.820352			0.886473			0.885544			0.84475			0.794027
	6.28992			0.816402			0.884226			0.882269			0.838488			0.786363
	6.33193			0.812658			0.882013			0.880054			0.832808			0.779058
	6.37395			0.810331			0.881063			0.878215			0.828836			0.773716
	6.41597			0.808334			0.881036			0.877074			0.825041			0.768857
	6.45798			0.806551			0.88109			0.876806			0.821454			0.763956
	6.5			0.806329			0.88233			0.876736			0.819518			0.760771

## Sheet: Figure6_(C)
Wavelength(μm)	1.5		H4=0.33(μm)	0.755092		H4=0.48(μm)	0.600407		H4=0.63(μm)	0.771056		H4=0.78(μm)	0.807632
	1.54202			0.732333			0.531255			0.733437			0.783371
	1.58403			0.715234			0.482537			0.690542			0.769546
	1.62605			0.706159			0.462917			0.642304			0.760432
	1.66807			0.706037			0.470076			0.588697			0.747335
	1.71008			0.713297			0.494765			0.533838			0.728937
	1.7521			0.726451			0.528476			0.488929			0.715557
	1.79412			0.743628			0.566447			0.460974			0.706656
	1.83613			0.763037			0.606141			0.453029			0.699315
	1.87815			0.785199			0.64613			0.464835			0.692211
	1.92017			0.808702			0.687722			0.496162			0.685323
	1.96218			0.840653			0.735507			0.550118			0.681843
	2.0042			0.935274			0.871403			0.693333			0.707683
	2.04622			0.927801			0.942443			0.676007			0.66974
	2.08824			0.915255			0.9694			0.706837			0.664632
	2.13025			0.908868			0.988454			0.778182			0.670223
	2.17227			0.907074			0.982347			0.858423			0.691824
	2.21429			0.908969			0.976122			0.909026			0.722843
	2.2563			0.913355			0.973776			0.930882			0.749719
	2.29832			0.919113			0.974702			0.940652			0.769605
	2.34034			0.925554			0.977853			0.947358			0.785445
	2.38235			0.931797			0.982131			0.953947			0.799978
	2.42437			0.936876			0.986653			0.960895			0.815086
	2.46639			0.940941			0.990711			0.967862			0.829932
	2.5084			0.943143			0.993601			0.974315			0.845478
	2.55042			0.944073			0.995083			0.979773			0.860372
	2.59244			0.943326			0.994943			0.983922			0.87475
	2.63445			0.941623			0.993224			0.986566			0.888054
	2.67647			0.939297			0.990026			0.987525			0.899413
	2.71849			0.936334			0.985671			0.986904			0.908773
	2.7605			0.933152			0.980509			0.984827			0.916091
	2.80252			0.930147			0.9749			0.981474			0.921235
	2.84454			0.927511			0.969203			0.977162			0.924234
	2.88655			0.925386			0.963751			0.97223			0.925312
	2.92857			0.923939			0.958847			0.966984			0.924806
	2.97059			0.92333			0.954764			0.961881			0.923101
	3.01261			0.923677			0.951702			0.957217			0.920607
	3.05462			0.925028			0.949734			0.953262			0.917737
	3.09664			0.927366			0.948938			0.950292			0.914887
	3.13866			0.93061			0.949428			0.948489			0.912412
	3.18067			0.934648			0.950985			0.947922			0.910618
	3.22269			0.939374			0.953606			0.948577			0.909795
	3.26471			0.944716			0.957073			0.950375			0.910231
	3.30672			0.950559			0.961231			0.953177			0.912131
	3.34874			0.956622			0.965813			0.956794			0.915413
	3.39076			0.962508			0.970713			0.960994			0.919651
	3.43277			0.96809			0.975563			0.965516			0.924526
	3.47479			0.973625			0.98029			0.970088			0.930206
	3.51681			0.979055			0.984694			0.974443			0.93664
	3.55882			0.98377			0.988543			0.978332			0.942835
	3.60084			0.987812			0.991762			0.981539			0.948168
	3.64286			0.991667			0.994284			0.983896			0.953229
	3.68487			0.994789			0.996007			0.985293			0.957595
	3.72689			0.997049			0.996856			0.985699			0.960175
	3.76891			0.99888			0.996807			0.985162			0.962063
	3.81092			0.999767			0.995873			0.983804			0.96337
	3.85294			0.999734			0.9941			0.981782			0.963145
	3.89496			0.998515			0.991594			0.979363			0.963904
	3.93697			0.996177			0.988568			0.977222			0.96505
	3.97899			0.991286			0.985442			0.976614			0.968262
	4.02101			0.985401			0.983016			0.978735			0.976019
	4.06303			0.975726			0.982707			0.984491			0.987069
	4.10504			0.970363			0.986132			0.993168			0.99772
	4.14706			0.974932			0.989796			0.987683			0.979701
	4.18908			0.998924			0.970816			0.93156			0.884474
	4.23109			0.974608			0.928913			0.857508			0.787968
	4.27311			0.940115			0.936418			0.885093			0.821491
	4.31513			0.918041			0.936926			0.918922			0.871557
	4.35714			0.893348			0.946618			0.955943			0.921343
	4.39916			0.907094			0.963175			0.98533			0.972968
	4.44118			0.921782			0.973286			0.995759			0.99223
	4.48319			0.93329			0.97845			0.997038			0.997109
	4.52521			0.944946			0.980872			0.993999			0.993569
	4.56723			0.951159			0.98176			0.990051			0.988323
	4.60924			0.9596			0.982078			0.985466			0.981341
	4.65126			0.964821			0.982453			0.981808			0.975953
	4.69328			0.97028			0.982863			0.9785			0.970903
	4.73529			0.975675			0.983308			0.976375			0.967153
	4.77731			0.97931			0.984126			0.974839			0.965225
	4.81933			0.983852			0.985232			0.974384			0.963529
	4.86134			0.987292			0.986399			0.974435			0.963853
	4.90336			0.990191			0.987857			0.975445			0.964715
	4.94538			0.993299			0.989475			0.976714			0.966227
	4.98739			0.995401			0.991037			0.978839			0.969078
	5.02941			0.997097			0.992714			0.980924			0.971914
	5.07143			0.998528			0.994259			0.983693			0.975321
	5.11345			0.999158			0.995621			0.986213			0.979297
	5.15546			0.999086			0.996802			0.989064			0.982979
	5.19748			0.998521			0.997594			0.991621			0.986752
	5.2395			0.99732			0.998032			0.994009			0.990499
	5.28151			0.995115			0.997969			0.996084			0.993655
	5.32353			0.992226			0.997383			0.997617			0.996298
	5.36555			0.988948			0.996189			0.998583			0.998402
	5.40756			0.98462			0.99439			0.998934			0.999646
	5.44958			0.979341			0.991884			0.998372			0.999847
	5.4916			0.973955			0.98878			0.997015			0.999029
	5.53361			0.967969			0.984917			0.994874			0.99719
	5.57563			0.96084			0.980537			0.991435			0.994073
	5.61765			0.953588			0.975415			0.987394			0.989561
	5.65966			0.946605			0.96992			0.982294			0.983929
	5.70168			0.938902			0.963774			0.975895			0.9772
	5.7437			0.930662			0.957437			0.969238			0.969057
	5.78571			0.923155			0.950618			0.96138			0.95968
	5.82773			0.916196			0.94378			0.952497			0.949547
	5.86975			0.908819			0.936724			0.943783			0.938554
	5.91176			0.901618			0.929748			0.933989			0.926439
	5.95378			0.895768			0.922926			0.923447			0.913633
	5.9958			0.890892			0.916175			0.913587			0.900656
	6.03782			0.886078			0.909993			0.903036			0.887314
	6.07983			0.881853			0.903867			0.891812			0.873357
	6.12185			0.879318			0.898562			0.881725			0.859263
	6.16387			0.878273			0.893516			0.87166			0.845581
	6.20588			0.877788			0.889158			0.860794			0.832115
	6.2479			0.877958			0.885544			0.851105			0.8185
	6.28992			0.879735			0.882269			0.842464			0.805062
	6.33193			0.883345			0.880054			0.833088			0.792408
	6.37395			0.888019			0.878215			0.824184			0.780511
	6.41597			0.893269			0.877074			0.81715			0.768872
	6.45798			0.899532			0.876806			0.810298			0.757452
	6.5			0.907319			0.876736			0.802898			0.746816
