# Supplementary material for: Ultra-broadband infrared metamaterial absorber based on MDMDM structure for optical sensing
Source: Frontiers journal article supplement (doi:10.3389/fspas.2023.1338284), 2024-01-05
Supplement: Data_Sheet_6.XLSX [file Data_Sheet_6.XLSX]

## Sheet: Sheet1
Wavelength1(μm)		φ=0°		φ=20°		φ=40°		φ=60°		φ=80°		φ=90°
1.5		0.601265		0.602745		0.606471		0.610733		0.613507		0.613959
1.51672		0.571261		0.573193		0.578069		0.583609		0.587311		0.587759
1.53344		0.543859		0.546178		0.552067		0.558679		0.563136		0.56361
1.55017		0.520138		0.522686		0.529188		0.536458		0.54122		0.541934
1.56689		0.500453		0.503049		0.509651		0.517137		0.521955		0.522692
1.58361		0.484723		0.487236		0.493562		0.500845		0.505637		0.506166
1.60033		0.472991		0.475368		0.481392		0.488213		0.492629		0.493366
1.61706		0.46553		0.467785		0.473517		0.479998		0.484275		0.484732
1.63378		0.462574		0.464766		0.470278		0.476619		0.480704		0.481389
1.6505		0.464363		0.466557		0.472161		0.478443		0.48259		0.483079
1.66722		0.470218		0.47248		0.478158		0.484719		0.488987		0.489536
1.68395		0.479345		0.481743		0.487844		0.494685		0.499137		0.49988
1.70067		0.490603		0.493192		0.499778		0.50728		0.512143		0.512794
1.71739		0.50346		0.506281		0.513325		0.521497		0.526893		0.527498
1.73411		0.517152		0.520244		0.528127		0.536917		0.542772		0.543502
1.75084		0.531515		0.53489		0.543547		0.553203		0.559481		0.56038
1.76756		0.546492		0.550156		0.559395		0.570036		0.576787		0.577817
1.78428		0.561902		0.565852		0.575709		0.587242		0.594511		0.595634
1.801		0.577654		0.581875		0.592439		0.604737		0.612518		0.613712
1.81773		0.593697		0.598168		0.609435		0.622416		0.630659		0.631907
1.83445		0.609929		0.614623		0.626514		0.640126		0.648765		0.650042
1.85117		0.626214		0.631104		0.643512		0.657707		0.666693		0.667961
1.86789		0.642459		0.647515		0.660328		0.675045		0.684381		0.685617
1.88462		0.658685		0.663878		0.676981		0.692123		0.701863		0.703106
1.90134		0.675046		0.680348		0.693646		0.709048		0.719181		0.720532
1.91806		0.691785		0.697172		0.710628		0.726103		0.736391		0.737864
1.93478		0.70927		0.714722		0.728405		0.743918		0.754064		0.755493
1.95151		0.728185		0.733691		0.747701		0.763479		0.773656		0.774994
1.96823		0.750005		0.755567		0.769827		0.786004		0.796598		0.798058
1.98495		0.779625		0.785243		0.799475		0.815713		0.826353		0.827853
2.00167		0.87008		0.875468		0.888873		0.904165		0.914058		0.915346
2.01839		0.886522		0.892311		0.9071		0.923905		0.934978		0.936556
2.03512		0.910161		0.915124		0.927756		0.94205		0.951278		0.952496
2.05184		0.934314		0.938104		0.947541		0.958362		0.965505		0.966524
2.06856		0.955732		0.9584		0.965296		0.973096		0.978131		0.978788
2.08528		0.971737		0.973583		0.978177		0.983384		0.986821		0.987326
2.10201		0.981017		0.982394		0.985908		0.989962		0.992577		0.992899
2.11873		0.985445		0.98663		0.989634		0.992974		0.995191		0.995533
2.13545		0.986157		0.987343		0.990334		0.993811		0.996031		0.996298
2.15217		0.984972		0.986251		0.989502		0.993137		0.995573		0.995934
2.1689		0.982806		0.984225		0.987816		0.991937		0.994557		0.994908
2.18562		0.980494		0.98205		0.985982		0.990447		0.99342		0.993815
2.20234		0.978344		0.980024		0.9843		0.989133		0.992262		0.992717
2.21906		0.976671		0.978445		0.982908		0.988034		0.991363		0.991803
2.23579		0.975471		0.977305		0.981972		0.987231		0.990706		0.991174
2.25251		0.974843		0.976707		0.981416		0.986789		0.990271		0.990769
2.26923		0.974702		0.976561		0.981266		0.986633		0.99012		0.990597
2.28595		0.975025		0.976855		0.981499		0.986753		0.99021		0.990668
2.30268		0.975757		0.977532		0.982024		0.987134		0.990473		0.990934
2.3194		0.976804		0.978503		0.982804		0.987711		0.990893		0.991343
2.33612		0.978123		0.979731		0.983806		0.988436		0.991454		0.991871
2.35284		0.979648		0.981152		0.98496		0.989281		0.992114		0.992493
2.36957		0.981298		0.982688		0.986207		0.990206		0.992825		0.993174
2.38629		0.983026		0.984294		0.987506		0.991164		0.993548		0.993874
2.40301		0.984786		0.985928		0.98882		0.992116		0.994259		0.994559
2.41973		0.986522		0.987537		0.990104		0.993027		0.99493		0.995199
2.43645		0.988182		0.98907		0.991318		0.993869		0.995535		0.995768
2.45318		0.989731		0.990492		0.992425		0.994613		0.996045		0.996242
2.4699		0.991137		0.991776		0.993397		0.995235		0.996436		0.996598
2.48662		0.992374		0.992894		0.994211		0.995709		0.996688		0.996818
2.50334		0.993414		0.99382		0.994846		0.996019		0.996784		0.996884
2.52007		0.994236		0.994534		0.995286		0.996148		0.996712		0.996783
2.53679		0.994823		0.99502		0.995517		0.996088		0.996462		0.996508
2.55351		0.995164		0.995268		0.99553		0.995832		0.996031		0.996053
2.57023		0.995254		0.995273		0.995321		0.995377		0.995416		0.995416
2.58696		0.995091		0.995033		0.994889		0.994724		0.99462		0.9946
2.60368		0.994677		0.994552		0.99424		0.993879		0.993649		0.993612
2.6204		0.994019		0.993837		0.993378		0.992851		0.992512		0.99246
2.63712		0.993126		0.992895		0.992317		0.991651		0.991222		0.991157
2.65385		0.99201		0.991742		0.991068		0.990295		0.989794		0.98972
2.67057		0.990688		0.990392		0.98965		0.988798		0.988246		0.988166
2.68729		0.989176		0.988864		0.98808		0.987182		0.986596		0.986515
2.70401		0.987497		0.987179		0.986378		0.985466		0.984865		0.984787
2.72074		0.985671		0.985358		0.984567		0.983671		0.983078		0.983003
2.73746		0.983722		0.983425		0.982669		0.981819		0.981255		0.981185
2.75418		0.981673		0.981402		0.980707		0.979931		0.979419		0.979352
2.7709		0.979547		0.979311		0.978704		0.978027		0.977588		0.977523
2.78763		0.977366		0.977175		0.976681		0.976128		0.975775		0.975717
2.80435		0.975152		0.975013		0.974658		0.974251		0.973994		0.973953
2.82107		0.972924		0.972845		0.97265		0.972417		0.972266		0.972248
2.83779		0.970705		0.970694		0.970674		0.97064		0.970612		0.970618
2.85452		0.968521		0.968584		0.96875		0.968937		0.969053		0.969074
2.87124		0.966395		0.966538		0.966901		0.967321		0.967596		0.967626
2.88796		0.964349		0.964577		0.965149		0.965806		0.966241		0.966291
2.90468		0.962392		0.962708		0.963504		0.964408		0.964998		0.965083
2.9214		0.96053		0.960938		0.96197		0.963137		0.963896		0.964011
2.93813		0.958777		0.959279		0.960553		0.962001		0.962948		0.963076
2.95485		0.957163		0.957761		0.959278		0.96101		0.962142		0.962285
2.97157		0.955713		0.956408		0.95817		0.960172		0.961475		0.961656
2.98829		0.954429		0.955221		0.957224		0.959494		0.960974		0.96119
3.00502		0.953296		0.954183		0.956425		0.958978		0.960651		0.960876
3.02174		0.952323		0.953304		0.955791		0.958629		0.960481		0.960723
3.03846		0.951549		0.952623		0.955351		0.958447		0.960459		0.960745
3.05518		0.950984		0.952147		0.955095		0.958433		0.960617		0.960923
3.07191		0.95059		0.951839		0.954989		0.958585		0.96094		0.961248
3.08863		0.950364		0.951693		0.955059		0.958898		0.961392		0.961739
3.10535		0.950351		0.951756		0.955327		0.959367		0.962002		0.962375
3.12207		0.950545		0.95202		0.955748		0.959986		0.962767		0.963134
3.1388		0.950889		0.952427		0.95631		0.960751		0.963639		0.964039
3.15552		0.951405		0.953001		0.957055		0.961649		0.964642		0.965063
3.17224		0.952135		0.95378		0.957948		0.962671		0.965772		0.966181
3.18896		0.953009		0.954694		0.958944		0.96381		0.966973		0.967416
3.20569		0.954008		0.955728		0.960096		0.965049		0.968279		0.968727
3.22241		0.955195		0.95694		0.961365		0.966376		0.969664		0.9701
3.23913		0.956505		0.958265		0.9627		0.967783		0.971083		0.971551
3.25585		0.957901		0.959669		0.964163		0.969251		0.972578		0.973026
3.27258		0.959457		0.961222		0.965695		0.970771		0.974091		0.974544
3.2893		0.961091		0.962844		0.967264		0.972328		0.975617		0.976079
3.30602		0.962782		0.964515		0.968927		0.973903		0.977169		0.977601
3.32274		0.964595		0.966296		0.97059		0.975491		0.97868		0.979132
3.33946		0.966422		0.968081		0.972279		0.977064		0.980189		0.980607
3.35619		0.968297		0.969907		0.974001		0.97862		0.981643		0.982062
3.37291		0.97024		0.971786		0.975676		0.980144		0.983047		0.983447
3.38963		0.972143		0.973618		0.977374		0.981611		0.984391		0.984765
3.40635		0.9741		0.975493		0.979012		0.983027		0.985636		0.986005
3.42308		0.976021		0.97732		0.980606		0.984352		0.986805		0.987128
3.4398		0.977912		0.979111		0.982159		0.985599		0.987841		0.988162
3.45652		0.979809		0.980891		0.98361		0.986738		0.98878		0.989047
3.47324		0.98161		0.982569		0.985019		0.987768		0.989564		0.989823
3.48997		0.983404		0.984227		0.986292		0.988672		0.990223		0.990424
3.50669		0.985094		0.98577		0.987496		0.989436		0.990706		0.990891
3.52341		0.986729		0.98725		0.988561		0.990064		0.991042		0.991165
3.54013		0.98828		0.98863		0.989519		0.990527		0.991187		0.991288
3.55686		0.989719		0.989894		0.990337		0.990838		0.991163		0.991196
3.57358		0.99109		0.991071		0.991018		0.990966		0.990933		0.99094
3.5903		0.992315		0.992098		0.991557		0.990931		0.990522		0.990453
3.60702		0.993467		0.993035		0.991936		0.990697		0.989888		0.989791
3.62375		0.99446		0.993809		0.992169		0.990292		0.989069		0.988885
3.64047		0.995365		0.994478		0.992228		0.989677		0.98801		0.987798
3.65719		0.996111		0.994983		0.992132		0.988884		0.986768		0.98646
3.67391		0.996749		0.995365		0.991859		0.987875		0.985269		0.984931
3.69064		0.997233		0.995587		0.991421		0.986682		0.983598		0.983155
3.70736		0.997592		0.995671		0.990807		0.985273		0.98165		0.981172
3.72408		0.997805		0.995601		0.990018		0.983673		0.979546		0.978965
3.7408		0.997878		0.99538		0.98906		0.981866		0.977153		0.976517
3.75753		0.997815		0.995015		0.987919		0.979855		0.974614		0.973891
3.77425		0.997602		0.994489		0.986617		0.97766		0.971789		0.970979
3.79097		0.997262		0.993831		0.985131		0.97524		0.96881		0.967944
3.80769		0.99677		0.993006		0.983489		0.972671		0.965586		0.964588
3.82441		0.996159		0.992063		0.981677		0.969855		0.96216		0.961139
3.84114		0.995406		0.990957		0.979703		0.966929		0.958576		0.957393
3.85786		0.994538		0.989744		0.977596		0.963747		0.954713		0.953509
3.87458		0.99356		0.988391		0.975309		0.960477		0.950805		0.949454
3.8913		0.992458		0.986934		0.972949		0.956995		0.946559		0.945134
3.90803		0.991312		0.985394		0.970397		0.953395		0.942332		0.940831
3.92475		0.990024		0.983737		0.967837		0.949712		0.937842		0.936176
3.94147		0.988794		0.982099		0.965121		0.94584		0.933292		0.931621
3.95819		0.987426		0.980341		0.962432		0.942067		0.928754		0.926879
3.97492		0.986219		0.978729		0.959738		0.93811		0.923992		0.922085
3.99164		0.984981		0.977073		0.957067		0.934376		0.919592		0.917569
4.00836		0.983955		0.975664		0.954672		0.930729		0.915056		0.912866
4.02508		0.983192		0.974473		0.95238		0.927318		0.911008		0.908832
4.04181		0.982649		0.973592		0.950688		0.924616		0.907569		0.905176
4.05853		0.982782		0.973374		0.949521		0.922373		0.904649		0.902237
4.07525		0.983287		0.973648		0.949264		0.921601		0.903585		0.901144
4.09197		0.984604		0.974922		0.950401		0.92244		0.904134		0.90156
4.1087		0.986585		0.977067		0.952958		0.925586		0.907756		0.905368
4.12542		0.988604		0.979842		0.957667		0.932471		0.916033		0.913766
4.14214		0.990113		0.98272		0.963992		0.94263		0.928641		0.926685
4.15886		0.989046		0.983817		0.970594		0.955604		0.945864		0.94458
4.17559		0.982685		0.98001		0.973203		0.965475		0.960422		0.959697
4.19231		0.970087		0.968815		0.965626		0.961959		0.959546		0.95922
4.20903		0.953599		0.952109		0.948365		0.944116		0.941373		0.941031
4.22575		0.935963		0.93387		0.928473		0.92236		0.918341		0.917725
4.24247		0.922973		0.92116		0.916608		0.91141		0.908007		0.90755
4.2592		0.923695		0.922888		0.920918		0.918674		0.917261		0.917131
4.27592		0.933862		0.933869		0.933821		0.9338		0.93378		0.933745
4.29264		0.938552		0.939022		0.940235		0.941582		0.942428		0.942528
4.30936		0.936461		0.937155		0.938946		0.940978		0.942331		0.942561
4.32609		0.936551		0.937026		0.938151		0.93947		0.940334		0.940431
4.34281		0.940587		0.940378		0.93988		0.93927		0.938832		0.938731
4.35953		0.946286		0.945047		0.941966		0.938469		0.936216		0.935957
4.37625		0.952982		0.950517		0.9442		0.937059		0.93242		0.931798
4.39298		0.959161		0.955446		0.946048		0.935308		0.928242		0.927208
4.4097		0.963837		0.958875		0.946374		0.932174		0.922928		0.921692
4.42642		0.967723		0.961565		0.945903		0.928135		0.916581		0.915046
4.44314		0.970805		0.963552		0.945185		0.924236		0.910496		0.908539
4.45987		0.972836		0.964537		0.943595		0.919803		0.904282		0.902155
4.47659		0.974427		0.965153		0.941609		0.914882		0.897504		0.895199
4.49331		0.975687		0.965522		0.939771		0.910415		0.891185		0.888485
4.51003		0.976393		0.965361		0.937504		0.905847		0.885167		0.882293
4.52676		0.976932		0.965083		0.935026		0.900906		0.878726		0.87578
4.54348		0.977415		0.96481		0.932861		0.896452		0.872631		0.869333
4.5602		0.977603		0.964245		0.930506		0.892146		0.867053		0.863529
4.57692		0.977733		0.963658		0.92798		0.887487		0.861163		0.857643
4.59365		0.97794		0.963196		0.925809		0.883218		0.855398		0.851608
4.61037		0.977992		0.962572		0.923611		0.879285		0.850252		0.846156
4.62709		0.978011		0.961939		0.921226		0.87503		0.844974		0.840896
4.64381		0.978169		0.961485		0.919163		0.870981		0.839574		0.83536
4.66054		0.978266		0.960961		0.917214		0.867403		0.834757		0.830176
4.67726		0.978321		0.960405		0.915063		0.863611		0.83007		0.82543
4.69398		0.978526		0.960039		0.913136		0.859793		0.825093		0.820465
4.7107		0.978751		0.959685		0.911447		0.856483		0.820489		0.815524
4.72742		0.978918		0.95927		0.909585		0.853167		0.816285		0.811102
4.74415		0.979208		0.959015		0.907801		0.849627		0.811818		0.806722
4.76087		0.979584		0.958848		0.906326		0.846476		0.807385		0.802113
4.77759		0.979905		0.95861		0.904783		0.843579		0.803472		0.797837
4.79431		0.980289		0.958466		0.903166		0.840411		0.799557		0.793915
4.81104		0.9808		0.958464		0.901832		0.837356		0.795393		0.789792
4.82776		0.981292		0.958421		0.90059		0.834731		0.791576		0.78564
4.84448		0.98178		0.95839		0.899195		0.832011		0.788104		0.781925
4.8612		0.982386		0.958506		0.897944		0.829115		0.784392		0.778326
4.87793		0.983032		0.958649		0.896922		0.826575		0.780641		0.774484
4.89465		0.983636		0.958743		0.895802		0.824253		0.777345		0.7708
4.91137		0.984298		0.958929		0.894638		0.821682		0.774151		0.76751
4.92809		0.985045		0.959207		0.893712		0.81915		0.770676		0.764171
4.94482		0.985768		0.95944		0.892855		0.81701		0.767357		0.760642
4.96154		0.986472		0.959673		0.891857		0.814869		0.764455		0.757373
4.97826		0.987248		0.960008		0.89094		0.812491		0.761484		0.754417
4.99498		0.988051		0.960358		0.890227		0.810315		0.758284		0.751332
5.01171		0.988804		0.96065		0.88946		0.808455		0.75535		0.748116
5.02843		0.989558		0.960977		0.888591		0.806457		0.752756		0.745194
5.04515		0.99036		0.961369		0.887868		0.804297		0.750008		0.742527
5.06187		0.991143		0.961722		0.887269		0.802412		0.747087		0.739705
5.0786		0.991869		0.962029		0.886555		0.800752		0.744472		0.736781
5.09532		0.992593		0.962371		0.885789		0.798896		0.742143		0.734145
5.11204		0.993331		0.962732		0.885179		0.796937		0.739632		0.731744
5.12876		0.994021		0.963029		0.884622		0.79527		0.736973		0.729197
5.14548		0.994646		0.963283		0.88393		0.793767		0.734615		0.726539
5.16221		0.995252		0.963554		0.883217		0.792052		0.732528		0.724138
5.17893		0.995838		0.963805		0.882641		0.790256		0.73027		0.721986
5.19565		0.996358		0.963979		0.882073		0.788739		0.72785		0.719724
5.21237		0.996801		0.964105		0.881363		0.787368		0.725693		0.717319
5.2291		0.997197		0.964221		0.880638		0.78579		0.723829		0.715109
5.24582		0.997548		0.964289		0.880028		0.784114		0.721841		0.713178
5.26254		0.99782		0.96427		0.879402		0.782687		0.71965		0.71121
5.27926		0.998		0.964192		0.878632		0.781424		0.717647		0.709064
5.29599		0.998104		0.964076		0.877833		0.77998		0.715971		0.707014
5.31271		0.99814		0.963893		0.877128		0.778392		0.714263		0.705259
5.32943		0.99809		0.963616		0.876404		0.776999		0.712318		0.703577
5.34615		0.997935		0.963266		0.875534		0.775812		0.710438		0.701719
5.36288		0.997678		0.962856		0.874609		0.774501		0.708892		0.69983
5.3796		0.997331		0.962362		0.873756		0.772992		0.707453		0.698191
5.39632		0.996895		0.96177		0.872899		0.771588		0.705795		0.696749
5.41304		0.99635		0.961096		0.8719		0.770426		0.704047		0.695215
5.42977		0.995682		0.960344		0.870809		0.769241		0.702563		0.693536
5.44649		0.994903		0.959497		0.869766		0.767831		0.701331		0.691975
5.46321		0.994031		0.958548		0.868746		0.766399		0.699999		0.690681
5.47993		0.993058		0.957514		0.867604		0.765195		0.698456		0.689456
5.49666		0.991957		0.956397		0.866333		0.764102		0.697		0.688076
5.51338		0.990725		0.955177		0.86507		0.762832		0.695856		0.686634
5.5301		0.98939		0.95385		0.863858		0.761406		0.694822		0.685389
5.54682		0.987969		0.952439		0.862573		0.760108		0.693594		0.684367
5.56355		0.986438		0.950954		0.861137		0.759024		0.692236		0.683332
5.58027		0.984768		0.94937		0.859649		0.757911		0.691074		0.682139
5.59699		0.982977		0.947674		0.858219		0.756585		0.690193		0.680945
5.61371		0.981108		0.945891		0.856791		0.755208		0.68932		0.679971
5.63043		0.979164		0.94405		0.855233		0.75403		0.688232		0.679183
5.64716		0.977104		0.942136		0.853557		0.753006		0.687084		0.678345
5.66388		0.974911		0.940116		0.851898		0.751872		0.686173		0.67736
5.6806		0.972625		0.937997		0.850308		0.750545		0.685508		0.676396
5.69732		0.970294		0.935828		0.848673		0.749243		0.684804		0.675651
5.71405		0.967902		0.933626		0.846898		0.74816		0.68389		0.675076
5.73077		0.965401		0.931353		0.845053		0.747187		0.682943		0.674452
5.74749		0.962786		0.92898		0.843274		0.746073		0.682237		0.673686
5.76421		0.960117		0.926541		0.841562		0.744792		0.681764		0.672929
5.78094		0.957438		0.924091		0.839785		0.743572		0.681253		0.67237
5.79766		0.954722		0.921633		0.837879		0.742575		0.680538		0.671993
5.81438		0.951915		0.919115		0.835942		0.741679		0.679774		0.671598
5.8311		0.949023		0.916516		0.834104		0.740646		0.679227		0.671063
5.84783		0.946114		0.913885		0.832344		0.739453		0.678926		0.670494
5.86455		0.943234		0.911283		0.830524		0.738319		0.678629		0.670084
5.88127		0.940352		0.908703		0.828588		0.737412		0.67814		0.669875
5.89799		0.937407		0.906086		0.826642		0.73663		0.677552		0.669708
5.91472		0.934405		0.903411		0.824817		0.735741		0.677124		0.669422
5.93144		0.931416		0.900731		0.823098		0.734687		0.676959		0.669044
5.94816		0.928498		0.898116		0.821347		0.733653		0.676878		0.668754
5.96488		0.925622		0.895561		0.819492		0.732834		0.676647		0.668664
5.98161		0.922722		0.893005		0.817622		0.732192		0.676255		0.668696
5.99833		0.919786		0.89041		0.815883		0.731509		0.675921		0.66867
6.01505		0.916882		0.887828		0.81429		0.730656		0.675834		0.668516
6.03177		0.914082		0.885335		0.812719		0.729752		0.67593		0.668343
6.04849		0.911377		0.882946		0.81106		0.729017		0.675974		0.668318
6.06522		0.908696		0.880601		0.809361		0.728511		0.675829		0.668475
6.08194		0.906002		0.878244		0.807771		0.728065		0.675608		0.668683
6.09866		0.903342		0.875898		0.806364		0.727487		0.675542		0.668789
6.11538		0.900798		0.873648		0.805056		0.726778		0.675721		0.668785
6.13211		0.898397		0.871539		0.803705		0.726134		0.675997		0.668808
6.14883		0.896085		0.869531		0.802282		0.725719		0.67615		0.668993
6.16555		0.893792		0.867548		0.800906		0.725485		0.676126		0.669331
6.18227		0.891524		0.865573		0.799712		0.725226		0.676086		0.669683
6.199		0.889356		0.863672		0.798697		0.724811		0.676234		0.669921
6.21572		0.887355		0.861921		0.797729		0.724319		0.676601		0.670058
6.23244		0.885507		0.860327		0.796695		0.723956		0.677016		0.670229
6.24916		0.883738		0.85882		0.795626		0.723831		0.677286		0.670551
6.26589		0.881998		0.857334		0.794664		0.723843		0.677386		0.671013
6.28261		0.880319		0.855885		0.793911		0.723792		0.677483		0.671483
6.29933		0.878782		0.854551		0.79332		0.723583		0.677764		0.67184
6.31605		0.877434		0.853394		0.792748		0.72332		0.678247		0.672085
6.33278		0.87624		0.852395		0.792105		0.723201		0.678772		0.672337
6.3495		0.875122		0.851472		0.791447		0.723313		0.679152		0.672716
6.36622		0.874042		0.850573		0.790917		0.72355		0.679353		0.673231
6.38294		0.87304		0.849724		0.790599		0.723718		0.679521		0.673774
6.39967		0.872194		0.849006		0.790438		0.723723		0.679837		0.674219
6.41639		0.871543		0.848472		0.790291		0.723658		0.68035		0.674531
6.43311		0.871046		0.848094		0.790069		0.723711		0.680933		0.674796
6.44983		0.870626		0.847789		0.789822		0.723983		0.6814		0.675139
6.46656		0.870243		0.847504		0.789686		0.724397		0.68167		0.675611
6.48328		0.869931		0.847263		0.789753		0.724767		0.68184		0.676151
6.5		0.869763		0.847141		0.789984		0.724972		0.682089		0.676631
