# Supplementary material for: Ultra-broadband infrared metamaterial absorber based on MDMDM structure for optical sensing
Source: Frontiers journal article supplement (doi:10.3389/fspas.2023.1338284), 2024-01-05
Supplement: Data_Sheet_7.XLSX [file Data_Sheet_7.XLSX]

## Sheet: Figure8_(B)
Wavelength(μm)	1.5		Angle=0°	0.600407		Angle=15°	0.530498		Angle=30°	0.515061		Angle=45°	0.672547		Angle=60°	0.621597	0.909155
	1.54202			0.531255			0.488506			0.522091			0.698807			0.656841
	1.58403			0.482537			0.467865			0.546748			0.717356			0.677844
	1.62605			0.462917			0.478427			0.59311			0.725407			0.694549
	1.66807			0.470076			0.529179			0.654891			0.728139			0.71146
	1.71008			0.494765			0.59809			0.744234			0.735795			0.728726
	1.7521			0.528476			0.665208			0.763248			0.746983			0.745576
	1.79412			0.566447			0.71402			0.773213			0.770732			0.762091
	1.83613			0.606141			0.745978			0.790598			0.794637			0.778
	1.87815			0.64613			0.771273			0.803803			0.809686			0.791916
	1.92017			0.687722			0.808628			0.812985			0.825146			0.8118
	1.96218			0.735507			0.830056			0.823306			0.843268			0.842632
	2.0042			0.871403			0.836145			0.83248			0.851307			0.869409
	2.04622			0.942443			0.843011			0.84147			0.859782			0.877393
	2.08824			0.9694			0.85319			0.851112			0.869272			0.883219
	2.13025			0.988454			0.865403			0.861734			0.87845			0.889585
	2.17227			0.982347			0.879588			0.873328			0.886745			0.898095
	2.21429			0.976122			0.895111			0.885639			0.895027			0.909043
	2.2563			0.973776			0.911			0.898305			0.903709			0.920177
	2.29832			0.974702			0.926466			0.910922			0.912747			0.929524
	2.34034			0.977853			0.9411			0.923073			0.921934			0.937836
	2.38235			0.982131			0.954535			0.93437			0.930829			0.946194
	2.42437			0.986653			0.966196			0.944484			0.939208			0.954578
	2.46639			0.990711			0.976147			0.953144			0.946775			0.962693
	2.5084			0.993601			0.984425			0.960087			0.953386			0.970028
	2.55042			0.995083			0.997647			0.965363			0.958901			0.976382
	2.59244			0.994943			0.995689			0.968864			0.963411			0.981589
	2.63445			0.993224			0.991706			0.970937			0.966958			0.985496
	2.67647			0.990026			0.988056			0.971623			0.969605			0.988077
	2.71849			0.985671			0.983699			0.97133			0.971547			0.989393
	2.7605			0.980509			0.978947			0.970439			0.972984			0.989522
	2.80252			0.9749			0.974125			0.969093			0.97405			0.988541
	2.84454			0.969203			0.969443			0.967565			0.974856			0.986534
	2.88655			0.963751			0.965077			0.966173			0.975511			0.983596
	2.92857			0.958847			0.961239			0.96512			0.976106			0.97984
	2.97059			0.954764			0.958125			0.964522			0.9767			0.975401
	3.01261			0.951702			0.955873			0.964486			0.977318			0.970443
	3.05462			0.949734			0.95455			0.965536			0.977955			0.965158
	3.09664			0.948938			0.954174			0.967218			0.978586			0.959738
	3.13866			0.949428			0.954737			0.969269			0.979171			0.954317
	3.18067			0.950985			0.956233			0.972023			0.979672			0.948966
	3.22269			0.953606			0.958637			0.974658			0.980084			0.943822
	3.26471			0.957073			0.961854			0.9777			0.980474			0.939269
	3.30672			0.961231			0.965694			0.980991			0.981006			0.935686
	3.34874			0.965813			0.969955			0.98423			0.982038			0.932885
	3.39076			0.970713			0.974482			0.987145			0.986254			0.930514
	3.43277			0.975563			0.979081			0.989524			0.991132			0.929163
	3.47479			0.98029			0.983413			0.991301			0.990867			0.92928
	3.51681			0.984694			0.987187			0.992627			0.995953			0.929793
	3.55882			0.988543			0.990456			0.993719			0.994985			0.930869
	3.60084			0.991762			0.993349			0.994587			0.995384			0.933373
	3.64286			0.994284			0.995628			0.995108			0.997582			0.935593
	3.68487			0.996007			0.997106			0.995415			0.999492			0.938632
	3.72689			0.996856			0.997973			0.995777			1.00067			0.950331
	3.76891			0.996807			0.998278			0.996059			1.00047			0.971769
	3.81092			0.995873			0.99783			0.9962			0.99832			0.971974
	3.85294			0.9941			0.996564			0.996669			0.993792			0.992599
	3.89496			0.991594			0.995			0.99704			0.985973			0.983292
	3.93697			0.988568			0.99265			0.996725			0.974581			0.975276
	3.97899			0.985442			0.990008			0.995711			0.959659			0.962459
	4.02101			0.983016			0.98789			0.992557			0.949132			0.943715
	4.06303			0.982707			0.985784			0.987232			0.941129			0.901626
	4.10504			0.986132			0.986236			0.980881			0.936614			0.854203
	4.14706			0.989796			0.984795			0.977685			0.938366			0.789367
	4.18908			0.970816			0.967584			0.979545			0.984664			0.84066
	4.23109			0.928913			0.939762			0.966679			0.987989			0.887289
	4.27311			0.936418			0.939533			0.951324			0.941854			0.842564
	4.31513			0.936926			0.942267			0.936835			0.906216			0.787779
	4.35714			0.946618			0.942101			0.918608			0.865778			0.731243
	4.39916			0.963175			0.956984			0.929015			0.875023			0.747265
	4.44118			0.973286			0.965958			0.938552			0.8914			0.782508
	4.48319			0.97845			0.971272			0.948111			0.905862			0.804286
	4.52521			0.980872			0.975908			0.955268			0.919236			0.825178
	4.56723			0.98176			0.977772			0.961004			0.926895			0.831051
	4.60924			0.982078			0.980845			0.967256			0.937805			0.840713
	4.65126			0.982453			0.982467			0.971744			0.945033			0.850599
	4.69328			0.982863			0.984549			0.977321			0.954242			0.860448
	4.73529			0.983308			0.986727			0.981327			0.962205			0.875814
	4.77731			0.984126			0.988305			0.985704			0.968809			0.887726
	4.81933			0.985232			0.990577			0.989352			0.975822			0.899781
	4.86134			0.986399			0.992293			0.992365			0.980318			0.911316
	4.90336			0.987857			0.994015			0.995212			0.984546			0.918032
	4.94538			0.989475			0.995809			0.997071			0.987322			0.924022
	4.98739			0.991037			0.997056			0.998567			0.988432			0.927419
	5.02941			0.992714			0.998182			0.999259			0.989014			0.926853
	5.07143			0.994259			0.998999			0.999262			0.987651			0.925717
	5.11345			0.995621			0.999258			0.998531			0.985452			0.922287
	5.15546			0.996802			0.999046			0.996957			0.98244			0.916081
	5.19748			0.997594			0.998384			0.994798			0.977646			0.910113
	5.2395			0.998032			0.99708			0.991641			0.972646			0.903207
	5.28151			0.997969			0.99501			0.987861			0.967039			0.894503
	5.32353			0.997383			0.992458			0.983583			0.959941			0.886765
	5.36555			0.996189			0.989291			0.978296			0.953141			0.879894
	5.40756			0.99439			0.985196			0.972676			0.946483			0.872157
	5.44958			0.991884			0.980623			0.966839			0.938671			0.865306
	5.4916			0.98878			0.975691			0.960172			0.931297			0.860772
	5.53361			0.984917			0.969901			0.953432			0.92512			0.856845
	5.57563			0.980537			0.96359			0.946973			0.918494			0.85318
	5.61765			0.975415			0.957306			0.940041			0.911897			0.851742
	5.65966			0.96992			0.950615			0.933138			0.907098			0.85259
	5.70168			0.963774			0.943362			0.927049			0.903225			0.854055
	5.7437			0.957437			0.936302			0.921093			0.899094			0.856344
	5.78571			0.950618			0.929579			0.915124			0.89608			0.860906
	5.82773			0.94378			0.922625			0.910154			0.895158			0.867437
	5.86975			0.936724			0.915655			0.906121			0.894961			0.874552
	5.91176			0.929748			0.909408			0.902237			0.894815			0.882277
	5.95378			0.922926			0.903777			0.898977			0.896067			0.891592
	5.9958			0.916175			0.898222			0.897107			0.899295			0.902357
	6.03782			0.909993			0.893015			0.896085			0.903243			0.913457
	6.07983			0.903867			0.888814			0.89533			0.907237			0.924471
	6.12185			0.898562			0.885508			0.895467			0.912226			0.935848
	6.16387			0.893516			0.882543			0.896998			0.91882			0.947638
	6.20588			0.889158			0.879995			0.899291			0.926147			0.959072
	6.2479			0.885544			0.878443			0.901811			0.933303			0.969429
	6.28992			0.882269			0.87798			0.905037			0.940559			0.978562
	6.33193			0.880054			0.878087			0.909406			0.948505			0.98641
	6.37395			0.878215			0.878478			0.914408			0.956849			0.992488
	6.41597			0.877074			0.879489			0.919383			0.964719			0.996146
	6.45798			0.876806			0.881464			0.924441			0.971648			0.997027
	6.5			0.876736			0.884169			0.929985			0.977707			0.995001

## Sheet: Figure8_(D)
Wavelength(μm)	1.5		Angle=0°	0.618797	0.874574	Angle=15°	0.595689		Angle=30°	0.432754		Angle=45°	0.680437		Angle=60°	0.672872	0.769244
	1.54202			0.554423			0.528602			0.47081			0.710227			0.714468
	1.58403			0.501627			0.498638			0.503524			0.745075			0.746348
	1.62605			0.474622			0.501221			0.543649			0.777985			0.777508
	1.66807			0.479211			0.527975			0.593013			0.816537			0.801955
	1.71008			0.506373			0.565807			0.65315			0.859291			0.809415
	1.7521			0.546091			0.612973			0.740105			0.883655			0.81291
	1.79412			0.590962			0.662965			0.788971			0.895532			0.81639
	1.83613			0.636932			0.707912			0.8519			0.899469			0.821296
	1.87815			0.682386			0.747077			0.8903			0.900323			0.835641
	1.92017			0.728023			0.788706			0.920643			0.901933			0.844577
	1.96218			0.77926			0.847076			0.940581			0.909159			0.851019
	2.0042			0.920963			0.901982			0.945791			0.919141			0.857685
	2.04622			0.964429			0.94078			0.94238			0.925759			0.867875
	2.08824			0.990049			0.952051			0.938836			0.928262			0.878379
	2.13025			0.997002			0.95354			0.938242			0.930275			0.886045
	2.17227			0.99464			0.954467			0.940369			0.932922			0.892342
	2.21429			0.99174			0.956141			0.944506			0.936212			0.897603
	2.2563			0.990178			0.958681			0.949895			0.939985			0.902289
	2.29832			0.99027			0.962383			0.955776			0.944407			0.905757
	2.34034			0.991434			0.967059			0.961431			0.948675			0.908908
	2.38235			0.993183			0.972195			0.966322			0.952477			0.911496
	2.42437			0.99485			0.977344			0.97022			0.95564			0.913359
	2.46639			0.995965			0.982379			0.973069			0.957814			0.914948
	2.5084			0.996202			0.989205			0.974844			0.959014			0.91668
	2.55042			0.995362			0.994898			0.975461			0.959707			0.918783
	2.59244			0.993391			0.991884			0.974883			0.959581			0.921405
	2.63445			0.990388			0.987684			0.973398			0.959147			0.924641
	2.67647			0.98658			0.98411			0.971039			0.958858			0.928518
	2.71849			0.982283			0.980307			0.968294			0.958759			0.933003
	2.7605			0.977842			0.976169			0.965288			0.958899			0.938012
	2.80252			0.973591			0.972576			0.962554			0.959405			0.94341
	2.84454			0.969752			0.969328			0.960206			0.960361			0.949001
	2.88655			0.966588			0.966862			0.958704			0.961739			0.954482
	2.92857			0.964231			0.965423			0.958557			0.963412			0.959375
	2.97059			0.962829			0.964832			0.960922			0.965177			0.96309
	3.01261			0.962388			0.965101			0.977366			0.966785			0.965202
	3.05462			0.963007			0.966327			0.97899			0.967947			0.965669
	3.09664			0.964513			0.968468			0.982176			0.968342			0.964461
	3.13866			0.966859			0.971354			0.985282			0.967652			0.960938
	3.18067			0.96993			0.974766			0.989747			0.965691			0.954577
	3.22269			0.973468			0.97847			0.992683			0.962627			0.946295
	3.26471			0.977247			0.982229			0.994694			0.959034			0.936446
	3.30672			0.98107			0.985803			0.996039			0.955448			0.923775
	3.34874			0.984717			0.98896			0.996564			0.952114			0.910039
	3.39076			0.987948			0.991488			0.99604			0.951677			0.895747
	3.43277			0.99053			0.993199			0.994275			0.97041			0.879182
	3.47479			0.992252			0.993915			0.991132			0.959514			0.86412
	3.51681			0.992934			0.993445			0.986508			0.948049			0.847569
	3.55882			0.992426			0.991594			0.980387			0.93649			0.832415
	3.60084			0.990619			0.988289			0.97292			0.924695			0.818101
	3.64286			0.98744			0.983678			0.964376			0.912341			0.804768
	3.68487			0.98286			0.977903			0.954813			0.898134			0.795258
	3.72689			0.97689			0.97068			0.94393			0.882415			0.793264
	3.76891			0.969567			0.961743			0.931838			0.86983			0.786639
	3.81092			0.960944			0.951871			0.919608			0.854408			0.768768
	3.85294			0.951072			0.941645			0.907399			0.841563			0.756769
	3.89496			0.940061			0.929727			0.893779			0.828702			0.74283
	3.93697			0.928237			0.916766			0.880297			0.815496			0.736889
	3.97899			0.916313			0.905796			0.869854			0.807908			0.725329
	4.02101			0.905475			0.894627			0.85991			0.79875			0.721873
	4.06303			0.898167			0.88698			0.855875			0.806233			0.730565
	4.10504			0.901638			0.895022			0.869717			0.81954			0.745614
	4.14706			0.931256			0.923889			0.904477			0.874079			0.810651
	4.18908			0.959416			0.955247			0.945236			0.918282			0.857642
	4.23109			0.910209			0.914778			0.921884			0.929816			0.904215
	4.27311			0.932565			0.937526			0.955109			0.977552			0.986769
	4.31513			0.945663			0.952678			0.967482			0.977125			0.975707
	4.35714			0.940367			0.940503			0.93946			0.923585			0.877154
	4.39916			0.928001			0.925952			0.908035			0.858415			0.802039
	4.44118			0.911482			0.902193			0.872991			0.818489			0.750805
	4.48319			0.892892			0.884258			0.849109			0.785167			0.714315
	4.52521			0.876695			0.863422			0.824335			0.759807			0.697047
	4.56723			0.860559			0.848811			0.808411			0.744767			0.678488
	4.60924			0.84609			0.831822			0.790249			0.725934			0.662819
	4.65126			0.833076			0.819962			0.778745			0.71627			0.656656
	4.69328			0.820164			0.805891			0.764582			0.705167			0.646669
	4.73529			0.809327			0.795866			0.755601			0.694243			0.636444
	4.77731			0.798024			0.784161			0.74431			0.689198			0.633299
	4.81933			0.788569			0.775231			0.736779			0.679946			0.628076
	4.86134			0.778799			0.765764			0.7281			0.674149			0.620327
	4.90336			0.77037			0.757338			0.721232			0.670774			0.618002
	4.94538			0.761909			0.75006			0.715188			0.663926			0.616766
	4.98739			0.754402			0.741931			0.708538			0.661171			0.611778
	5.02941			0.747002			0.736363			0.704745			0.659203			0.608906
	5.07143			0.740405			0.729047			0.698672			0.654462			0.609821
	5.11345			0.733849			0.724056			0.695809			0.65325			0.608576
	5.15546			0.728172			0.7185			0.691448			0.652546			0.605288
	5.19748			0.722288			0.71312			0.687899			0.649054			0.604928
	5.2395			0.717527			0.709362			0.685694			0.647945			0.606113
	5.28151			0.712224			0.704161			0.681475			0.647838			0.60438
	5.32353			0.708285			0.700643			0.679641			0.644766			0.601186
	5.36555			0.703623			0.69706			0.676659			0.642424			0.600218
	5.40756			0.700255			0.692851			0.673224			0.641949			0.600002
	5.44958			0.696469			0.690344			0.671672			0.639279			0.597144
	5.4916			0.693315			0.687019			0.668216			0.635521			0.592744
	5.53361			0.690624			0.683834			0.665532			0.63397			0.5901
	5.57563			0.687563			0.681985			0.664053			0.632422			0.588925
	5.61765			0.685738			0.679246			0.660859			0.628878			0.586361
	5.65966			0.683229			0.676944			0.658941			0.626165			0.582129
	5.70168			0.681547			0.67577			0.658			0.625519			0.578882
	5.7437			0.680188			0.673844			0.655602			0.624226			0.577869
	5.78571			0.678373			0.672277			0.654428			0.621717			0.577224
	5.82773			0.677758			0.671805			0.65439			0.620593			0.575114
	5.86975			0.67668			0.670802			0.653053			0.6212			0.572455
	5.91176			0.675788			0.669838			0.652447			0.621167			0.571366
	5.95378			0.675833			0.669952			0.653326			0.620151			0.5721
	5.9958			0.675152			0.669903			0.653234			0.620277			0.572859
	6.03782			0.675045			0.6695			0.653021			0.622034			0.572357
	6.07983			0.67556			0.669938			0.654445			0.623531			0.571435
	6.12185			0.675308			0.670719			0.655711			0.623966			0.571793
	6.16387			0.675717			0.670971			0.656027			0.624864			0.573798
	6.20588			0.67661			0.671481			0.657385			0.62731			0.57614
	6.2479			0.676694			0.672673			0.659679			0.630209			0.577518
	6.28992			0.677298			0.673645			0.661041			0.632198			0.578134
	6.33193			0.678432			0.674243			0.662106			0.633762			0.579337
	6.37395			0.678707			0.675255			0.664404			0.636316			0.582046
	6.41597			0.679132			0.676589			0.666968			0.640023			0.585808
	6.45798			0.680243			0.677508			0.66851			0.643671			0.589404
	6.5			0.680607			0.67815			0.67008			0.646526			0.59219
